# Supplementary material for: Assessment of the impact of phenylketonuria and its treatment on quality of life of patients and parents from seven European countries
Source: Springer Nature journal article supplement (doi:10.1186/s13023-015-0294-x), 2015-06-17
Supplement: MOESM1 [file 9776166]

**Additional File 1 : Comparison of PKU-QOL scores according to severity of PKU (Mild-moderate PKU : Phe level 600-1200 µmol/L ; Classical PKU : Phe level >1200 µmol/L)**

| <b>Table 1_a : Comparison of the Child PKU-QOL scores according to severity of PKU</b> |                         |                         |                                         |                                     |                 |
|----------------------------------------------------------------------------------------|-------------------------|-------------------------|-----------------------------------------|-------------------------------------|-----------------|
| <b>Modules</b>                                                                         | <b>Domains</b>          |                         | <b>Mild-moderate<br/>PKU<br/>(N=22)</b> | <b>Classical<br/>PKU<br/>(N=66)</b> | <b>p-value*</b> |
| <b>Symptoms</b>                                                                        | Headaches               | <b>Mean (SD)</b>        | 18.8 (28.0)                             | 14.5 (19.3)                         | 0.817           |
|                                                                                        |                         | <b>Median (Q1 – Q3)</b> | 0.0 (0.0 – 100.0)                       | 0.0 (0.0 – 75.0)                    |                 |
|                                                                                        | Stomach aches           | <b>Mean (SD)</b>        | 20.0 (25.1)                             | 14.8 (21.7)                         | 0.455           |
|                                                                                        |                         | <b>Median (Q1 – Q3)</b> | 0.0 (0.0 – 75.0)                        | 0.0 (0.0 – 100.0)                   |                 |
|                                                                                        | Tiredness               | <b>Mean (SD)</b>        | 37.5 (32.9)                             | 34.0 (24.9)                         | 0.666           |
|                                                                                        |                         | <b>Median (Q1 – Q3)</b> | 50.0 (0.0 – 100.0)                      | 25.0 (0.0 – 100.0)                  |                 |
|                                                                                        | Irritability            | <b>Mean (SD)</b>        | 25.0 (38.9)                             | 18.0 (25.0)                         | 0.948           |
|                                                                                        |                         | <b>Median (Q1 – Q3)</b> | 0.0 (0.0 – 100.0)                       | 0.0 (0.0 – 100.0)                   |                 |
|                                                                                        | Aggressiveness          | <b>Mean (SD)</b>        | 20.0 (31.0)                             | 10.2 (21.2)                         | 0.238           |
|                                                                                        |                         | <b>Median (Q1 – Q3)</b> | 0.0 (0.0 – 100.0)                       | 0.0 (0.0 – 100.0)                   |                 |
|                                                                                        | Moodiness               | <b>Mean (SD)</b>        | 22.5 (26.8)                             | 15.6 (22.9)                         | 0.334           |
|                                                                                        |                         | <b>Median (Q1 – Q3)</b> | 0.0 (0.0 – 75.0)                        | 0.0 (0.0 – 100.0)                   |                 |
|                                                                                        | Sadness                 | <b>Mean (SD)</b>        | 22.6 (29.5)                             | 15.2 (21.2)                         | 0.417           |
|                                                                                        |                         | <b>Median (Q1 – Q3)</b> | 0.0 (0.0 – 100.0)                       | 0.0 (0.0 – 100.0)                   |                 |
|                                                                                        | Anxiety                 | <b>Mean (SD)</b>        | 8.8 (18.6)                              | 9.8 (18.7)                          | 0.725           |
|                                                                                        |                         | <b>Median (Q1 – Q3)</b> | 0.0 (0.0 – 50.0)                        | 0.0 (0.0 – 75.0)                    |                 |
|                                                                                        | Lack of concentration   | <b>Mean (SD)</b>        | 22.4 (29.9)                             | 22.8 (28.5)                         | 0.887           |
|                                                                                        |                         | <b>Median (Q1 – Q3)</b> | 0.0 (0.0 – 100.0)                       | 25.0 (0.0 – 100.0)                  |                 |
|                                                                                        | Slow thinking           | <b>Mean (SD)</b>        | 22.4 (26.2)                             | 23.2 (26.5)                         | 0.938           |
|                                                                                        |                         | <b>Median (Q1 – Q3)</b> | 25.0 (0.0 – 100.0)                      | 25.0 (0.0 – 100.0)                  |                 |
| <b>PKU in general</b>                                                                  | Emotional impact of PKU | <b>Mean (SD)</b>        | 35.3 (21.6)                             | 32.1 (22.0)                         | 0.496           |
|                                                                                        |                         | <b>Median (Q1 – Q3)</b> | 33.3 (0.0 – 66.7)                       | 25.0 (0.0 – 83.3)                   |                 |
|                                                                                        | Practical impact of PKU | <b>Mean (SD)</b>        | 16.1 (21.3)                             | 10.0 (15.3)                         | 0.325           |
|                                                                                        |                         | <b>Median (Q1 – Q3)</b> | 0.0 (0.0 – 75.0)                        | 0.0 (0.0 – 75.0)                    |                 |
|                                                                                        | Social impact of PKU    | <b>Mean (SD)</b>        | 21.0 (21.0)                             | 19.8 (17.3)                         | 0.830           |
|                                                                                        |                         | <b>Median (Q1 – Q3)</b> | 16.7 (0.0 – 91.7)                       | 16.7 (0.0 – 75.0)                   |                 |
|                                                                                        | Overall impact of PKU   | <b>Mean (SD)</b>        | 25.1 (17.1)                             | 22.0 (14.9)                         | 0.494           |
|                                                                                        |                         | <b>Median (Q1 – Q3)</b> | 18.8 (0.0 – 71.9)                       | 18.8 (0.0 – 78.1)                   |                 |
|                                                                                        | Anxiety – Blood test    | <b>Mean (SD)</b>        | 8.3 (15.0)                              | 13.7 (17.3)                         | 0.181           |
|                                                                                        |                         | <b>Median (Q1 – Q3)</b> | 0.0 (0.0 – 62.5)                        | 12.5 (0.0 – 50.0)                   |                 |
|                                                                                        | Anxiety – Phe levels    | <b>Mean (SD)</b>        | 58.3 (39.8)                             | 42.6 (35.3)                         | 0.102           |
|                                                                                        |                         | <b>Median (Q1 – Q3)</b> | 50.0 (0.0 – 100.0)                      | 25.0 (0.0 – 100.0)                  |                 |

**Table 1\_a : Comparison of the Child PKU-QOL scores according to severity of PKU (cont'd)**

| Modules                            | Domains                                                  |                         | Mild-moderate<br>PKU<br>(N=22) | Classical<br>PKU<br>(N=66) | p-value*     |
|------------------------------------|----------------------------------------------------------|-------------------------|--------------------------------|----------------------------|--------------|
| <b>Supplement administration</b>   | Adherence to supplements                                 | <b>Mean (SD)</b>        | 14.0 (17.6)                    | 10.3 (17.6)                | 0.327        |
|                                    |                                                          | <b>Median (Q1 – Q3)</b> | 12.5 (0.0 – 50.0)              | 0.0 (0.0 – 100.0)          |              |
|                                    | Practical impact of supplements                          | <b>Mean (SD)</b>        | 15.3 (33.4)                    | 20.2 (31.7)                | 0.391        |
|                                    |                                                          | <b>Median (Q1 – Q3)</b> | 0.0 (0.0 – 100.0)              | 0.0 (0.0 – 100.0)          |              |
|                                    | Guilt if poor adherence to supplements                   | <b>Mean (SD)</b>        | 25.0 (34.2)                    | 52.0 (37.7)                | <b>0.009</b> |
|                                    |                                                          | <b>Median (Q1 – Q3)</b> | 0.0 (0.0 – 100.0)              | 50.0 (0.0 – 100.0)         |              |
|                                    | Relationships within family because of supplements       | <b>Mean (SD)</b>        | 19.4 (31.6)                    | 6.7 (17.5)                 | 0.090        |
|                                    |                                                          | <b>Median (Q1 – Q3)</b> | 0.0 (0.0 – 100.0)              | 0.0 (0.0 – 100.0)          |              |
|                                    | Taste - Supplements                                      | <b>Mean (SD)</b>        | 48.5 (25.7)                    | 31.5 (31.0)                | <b>0.027</b> |
|                                    |                                                          | <b>Median (Q1 – Q3)</b> | 50.0 (0.0 – 100.0)             | 25.0 (0.0 – 100.0)         |              |
| <b>Dietary protein restriction</b> | Food temptations                                         | <b>Mean (SD)</b>        | 40.1 (33.5)                    | 26.8 (25.4)                | 0.129        |
|                                    |                                                          | <b>Median (Q1 – Q3)</b> | 37.5 (0.0 – 100.0)             | 25.0 (0.0 – 100.0)         |              |
|                                    | Adherence to dietary protein restriction                 | <b>Mean (SD)</b>        | 9.9 (17.5)                     | 10.7 (16.3)                | 0.761        |
|                                    |                                                          | <b>Median (Q1 – Q3)</b> | 0.0 (0.0 – 62.5)               | 0.0 (0.0 – 62.5)           |              |
|                                    | Social impact of dietary protein restriction             | <b>Mean (SD)</b>        | 26.1 (24.8)                    | 16.8 (16.5)                | 0.196        |
|                                    |                                                          | <b>Median (Q1 – Q3)</b> | 15.0 (0.0 – 80.0)              | 12.5 (0.0 – 62.5)          |              |
|                                    | Taste – low protein food                                 | <b>Mean (SD)</b>        | 19.2 (20.8)                    | 18.5 (24.4)                | 0.713        |
|                                    |                                                          | <b>Median (Q1 – Q3)</b> | 25.0 (0.0 – 50.0)              | 25.0 (0.0 – 100.0)         |              |
|                                    | Food enjoyment                                           | <b>Mean (SD)</b>        | 16.7 (22.8)                    | 18.0 (24.2)                | 0.787        |
|                                    |                                                          | <b>Median (Q1 – Q3)</b> | 0.0 (0.0 – 50.0)               | 0.0 (0.0 – 100.0)          |              |
|                                    | Guilt if dietary protein restriction not followed        | <b>Mean (SD)</b>        | 38.2 (45.2)                    | 57.9 (39.2)                | 0.059        |
|                                    |                                                          | <b>Median (Q1 – Q3)</b> | 0.0 (0.0 – 100.0)              | 62.5 (0.0 – 100.0)         |              |
|                                    | Overall difficulty following dietary protein restriction | <b>Mean (SD)</b>        | 26.3 (37.7)                    | 17.5 (24.4)                | 0.664        |
|                                    |                                                          | <b>Median (Q1 – Q3)</b> | 0.0 (0.0 – 100.0)              | 0.0 (0.0 – 100.0)          |              |

\*Non-parametric P-value for between-group comparisons: Mann-Whitney-Wilcoxon  
 In bold p-value<0.05

**Table 1\_b : Comparison of the Adolescent PKU-QOL scores according to severity of PKU**

| Modules                 | Domains                  |                         | Mild-moderate<br>PKU<br>(N=33) | Classical<br>PKU<br>(N=75) | p-value*     |
|-------------------------|--------------------------|-------------------------|--------------------------------|----------------------------|--------------|
| <b>Symptoms</b>         | Self-rated status health | <b>Mean (SD)</b>        | 25.8 (26.2)                    | 39.2 (22.5)                | <b>0.012</b> |
|                         |                          | <b>Median (Q1 – Q3)</b> | 25.0 (0.0 – 75.0)              | 50.0 (0.0 – 75.0)          |              |
|                         | Headaches                | <b>Mean (SD)</b>        | 15.3 (22.1)                    | 21.9 (26.5)                | 0.245        |
|                         |                          | <b>Median (Q1 – Q3)</b> | 0.0 (0.0 – 75.0)               | 25.0 (0.0 – 100.0)         |              |
|                         | Stomach aches            | <b>Mean (SD)</b>        | 12.9 (18.1)                    | 15.6 (22.4)                | 0.716        |
|                         |                          | <b>Median (Q1 – Q3)</b> | 0.0 (0.0 – 50.0)               | 0.0 (0.0 – 100.0)          |              |
|                         | Tiredness                | <b>Mean (SD)</b>        | 38.7 (26.5)                    | 40.3 (25.4)                | 0.632        |
|                         |                          | <b>Median (Q1 – Q3)</b> | 50.0 (0.0 – 100.0)             | 50.0 (0.0 – 100.0)         |              |
|                         | Irritability             | <b>Mean (SD)</b>        | 18.9 (21.7)                    | 26.7 (27.3)                | 0.213        |
|                         |                          | <b>Median (Q1 – Q3)</b> | 25.0 (0.0 – 75.0)              | 25.0 (0.0 – 100.0)         |              |
|                         | Aggressiveness           | <b>Mean (SD)</b>        | 9.1 (18.6)                     | 12.5 (23.4)                | 0.494        |
|                         |                          | <b>Median (Q1 – Q3)</b> | 0.0 (0.0 – 50.0)               | 0.0 (0.0 – 100.0)          |              |
|                         | Moodiness                | <b>Mean (SD)</b>        | 12.9 (19.9)                    | 22.9 (23.6)                | <b>0.030</b> |
|                         |                          | <b>Median (Q1 – Q3)</b> | 0.0 (0.0 – 50.0)               | 25.0 (0.0 – 75.0)          |              |
|                         | Sadness                  | <b>Mean (SD)</b>        | 9.8 (18.7)                     | 13.5 (20.1)                | 0.293        |
|                         |                          | <b>Median (Q1 – Q3)</b> | 0.0 (0.0 – 50.0)               | 0.0 (0.0 – 75.0)           |              |
|                         | Anxiety                  | <b>Mean (SD)</b>        | 13.6 (23.5)                    | 14.2 (24.0)                | 1.000        |
|                         |                          | <b>Median (Q1 – Q3)</b> | 0.0 (0.0 – 100.0)              | 0.0 (0.0 – 100.0)          |              |
|                         | Lack of concentration    | <b>Mean (SD)</b>        | 16.7 (27.7)                    | 21.2 (22.9)                | 0.140        |
|                         |                          | <b>Median (Q1 – Q3)</b> | 0.0 (0.0 – 100.0)              | 25.0 (0.0 – 75.0)          |              |
|                         | Slow thinking            | <b>Mean (SD)</b>        | 9.8 (16.5)                     | 16.0 (21.1)                | 0.171        |
|                         |                          | <b>Median (Q1 – Q3)</b> | 0.0 (0.0 – 50.0)               | 0.0 (0.0 – 75.0)           |              |
| <b>PKU in general</b>   | Emotional impact of PKU  | <b>Mean (SD)</b>        | 26.1 (14.9)                    | 34.9 (21.5)                | 0.115        |
|                         |                          | <b>Median (Q1 – Q3)</b> | 27.5 (0.0 – 60.0)              | 30.0 (0.0 – 90.0)          |              |
| Practical impact of PKU | <b>Mean (SD)</b>         | 9.7 (13.2)              | 12.7 (14.1)                    | 0.440                      |              |
|                         | <b>Median (Q1 – Q3)</b>  | 4.2 (0.0 – 33.3)        | 8.3 (0.0 – 50.0)               |                            |              |
| Social impact of PKU    | <b>Mean (SD)</b>         | 11.6 (10.7)             | 17.0 (15.5)                    | 0.106                      |              |
|                         | <b>Median (Q1 – Q3)</b>  | 8.3 (0.0 – 33.3)        | 16.7 (0.0 – 91.7)              |                            |              |
| Overall impact of PKU   | <b>Mean (SD)</b>         | 17.8 (9.3)              | 25.0 (16.9)                    | 0.067                      |              |
|                         | <b>Median (Q1 – Q3)</b>  | 17.5 (0.0 – 34.1)       | 22.6 (0.0 – 85.0)              |                            |              |
| Anxiety - Blood test    | <b>Mean (SD)</b>         | 10.2 (21.6)             | 11.5 (20.5)                    | 0.690                      |              |
|                         | <b>Median (Q1 – Q3)</b>  | 0.0 (0.0 – 100.0)       | 0.0 (0.0 – 87.5)               |                            |              |
| Anxiety - Phe levels    | <b>Mean (SD)</b>         | 30.5 (30.3)             | 38.2 (32.2)                    | 0.255                      |              |
|                         | <b>Median (Q1 – Q3)</b>  | 25.0 (0.0 – 100.0)      | 25.0 (0.0 – 100.0)             |                            |              |

**Table 1\_b : Comparison of the Adolescent PKU-QOL scores according to severity of PKU (cont'd)**

| Modules                            | Domains                                                  |                         | Mild-moderate<br>PKU<br>(N=33) | Classical<br>PKU<br>(N=75) | p-value*     |
|------------------------------------|----------------------------------------------------------|-------------------------|--------------------------------|----------------------------|--------------|
| <b>Supplement administration</b>   | Adherence to supplements                                 | <b>Mean (SD)</b>        | 10.3 (11.0)                    | 16.1 (20.9)                | 0.590        |
|                                    |                                                          | <b>Median (Q1 – Q3)</b> | 6.3 (0.0 – 33.3)               | 6.3 (0.0 – 83.3)           |              |
|                                    | Practical impact of supplements                          | <b>Mean (SD)</b>        | 7.4 (8.5)                      | 22.8 (25.5)                | <b>0.013</b> |
|                                    |                                                          | <b>Median (Q1 – Q3)</b> | 6.3 (0.0 – 31.3)               | 18.8 (0.0 – 100.0)         |              |
|                                    | Guilt if poor adherence to supplements                   | <b>Mean (SD)</b>        | 37.5 (34.3)                    | 45.4 (36.4)                | 0.396        |
|                                    |                                                          | <b>Median (Q1 – Q3)</b> | 25.0 (0.0 – 100.0)             | 25.0 (0.0 – 100.0)         |              |
|                                    | Relationships within family because of supplements       | <b>Mean (SD)</b>        | 14.3 (21.8)                    | 14.6 (26.5)                | 0.605        |
|                                    |                                                          | <b>Median (Q1 – Q3)</b> | 0.0 (0.0 – 75.0)               | 0.0 (0.0 – 100.0)          |              |
|                                    | Taste - Supplements                                      | <b>Mean (SD)</b>        | 46.4 (21.3)                    | 38.9 (25.5)                | 0.065        |
|                                    |                                                          | <b>Median (Q1 – Q3)</b> | 50.0 (0.0 – 75.0)              | 37.5 (0.0 – 100.0)         |              |
| <b>Dietary protein restriction</b> | Food temptations                                         | <b>Mean (SD)</b>        | 18.8 (26.7)                    | 28.6 (28.4)                | 0.106        |
|                                    |                                                          | <b>Median (Q1 – Q3)</b> | 0.0 (0.0 – 100.0)              | 25.0 (0.0 – 100.0)         |              |
|                                    | Adherence to dietary protein restriction                 | <b>Mean (SD)</b>        | 7.5 (10.8)                     | 15.3 (20.0)                | 0.115        |
|                                    |                                                          | <b>Median (Q1 – Q3)</b> | 0.0 (0.0 – 33.3)               | 10.4 (0.0 – 83.3)          |              |
|                                    | Practical impact of dietary protein restriction          | <b>Mean (SD)</b>        | 20.2 (9.7)                     | 29.0 (19.3)                | 0.188        |
|                                    |                                                          | <b>Median (Q1 – Q3)</b> | 20.7 (3.6 – 30.0)              | 28.6 (0.0 – 85.7)          |              |
|                                    | Social impact of dietary protein restriction             | <b>Mean (SD)</b>        | 5.5 (9.6)                      | 16.3 (22.2)                | 0.064        |
|                                    |                                                          | <b>Median (Q1 – Q3)</b> | 2.5 (0.0 – 40.0)               | 7.5 (0.0 – 90.0)           |              |
|                                    | Overall impact of dietary protein restriction            | <b>Mean (SD)</b>        | 12.1 (8.8)                     | 22.9 (18.2)                | <b>0.018</b> |
|                                    |                                                          | <b>Median (Q1 – Q3)</b> | 13.1 (0.0 – 31.3)              | 18.2 (0.0 – 86.4)          |              |
|                                    | Taste – low protein food                                 | <b>Mean (SD)</b>        | 21.4 (19.3)                    | 26.8 (26.9)                | 0.680        |
|                                    |                                                          | <b>Median (Q1 – Q3)</b> | 25.0 (0.0 – 50.0)              | 25.0 (0.0 – 100.0)         |              |
|                                    | Food enjoyment                                           | <b>Mean (SD)</b>        | 7.9 (20.5)                     | 18.6 (27.8)                | <b>0.048</b> |
|                                    |                                                          | <b>Median (Q1 – Q3)</b> | 0.0 (0.0 – 75.0)               | 0.0 (0.0 – 100.0)          |              |
|                                    | Guilt if dietary protein restriction not followed        | <b>Mean (SD)</b>        | 31.8 (36.3)                    | 51.4 (34.3)                | <b>0.022</b> |
|                                    |                                                          | <b>Median (Q1 – Q3)</b> | 25.0 (0.0 – 100.0)             | 50.0 (0.0 – 100.0)         |              |
|                                    | Overall difficulty following dietary protein restriction | <b>Mean (SD)</b>        | 7.1 (14.0)                     | 20.1 (28.7)                | 0.052        |
|                                    |                                                          | <b>Median (Q1 – Q3)</b> | 0.0 (0.0 – 50.0)               | 0.0 (0.0 – 100.0)          |              |

\*Non-parametric P-value for between-group comparisons: Mann-Whitney-Wilcoxon  
In bold p-value<0.05

**Table 1\_c : Comparison of the Adult PKU-QOL scores according to severity of PKU**

| Modules               | Domains                               |                    | Mild-moderate<br>PKU<br>(N=37) | Classical<br>PKU<br>(N=67) | p-value*     |
|-----------------------|---------------------------------------|--------------------|--------------------------------|----------------------------|--------------|
| <b>Symptoms</b>       | Self-rated health status              | Mean (SD)          | 35.4 (22.7)                    | 32.5 (23.0)                | 0.370        |
|                       |                                       | Median (Q1 – Q3)   | 50.0 (0.0 – 75.0)              | 25.0 (0.0 – 100.0)         |              |
|                       | Headaches                             | Mean (SD)          | 23.6 (23.9)                    | 20.1 (23.7)                | 0.426        |
|                       |                                       | Median (Q1 – Q3)   | 25.0 (0.0 – 75.0)              | 12.5 (0.0 – 75.0)          |              |
|                       | Stomach aches                         | Mean (SD)          | 18.8 (25.6)                    | 15.5 (25.9)                | 0.397        |
|                       |                                       | Median (Q1 – Q3)   | 0.0 (0.0 – 75.0)               | 0.0 (0.0 – 100.0)          |              |
|                       | Tiredness                             | Mean (SD)          | 44.4 (26.8)                    | 44.3 (28.0)                | 0.945        |
|                       |                                       | Median (Q1 – Q3)   | 50.0 (0.0 – 100.0)             | 50.0 (0.0 – 100.0)         |              |
|                       | Trembling hands                       | Mean (SD)          | 11.8 (21.1)                    | 12.9 (24.1)                | 0.989        |
|                       |                                       | Median (Q1 – Q3)   | 0.0 (0.0 – 75.0)               | 0.0 (0.0 – 100.0)          |              |
|                       | Irritability                          | Mean (SD)          | 32.6 (26.6)                    | 34.0 (24.1)                | 0.752        |
|                       |                                       | Median (Q1 – Q3)   | 37.5 (0.0 – 100.0)             | 25.0 (0.0 – 75.0)          |              |
|                       | Aggressiveness                        | Mean (SD)          | 13.2 (21.1)                    | 12.1 (21.6)                | 0.688        |
|                       |                                       | Median (Q1 – Q3)   | 0.0 (0.0 – 75.0)               | 0.0 (0.0 – 75.0)           |              |
|                       | Moodiness                             | Mean (SD)          | 22.2 (23.0)                    | 23.5 (25.9)                | 0.919        |
|                       |                                       | Median (Q1 – Q3)   | 25.0 (0.0 – 50.0)              | 25.0 (0.0 – 75.0)          |              |
|                       | Sadness                               | Mean (SD)          | 30.6 (29.9)                    | 28.0 (27.6)                | 0.733        |
|                       |                                       | Median (Q1 – Q3)   | 25.0 (0.0 – 100.0)             | 25.0 (0.0 – 100.0)         |              |
|                       | Anxiety                               | Mean (SD)          | 27.1 (30.7)                    | 19.3 (28.4)                | 0.180        |
|                       |                                       | Median (Q1 – Q3)   | 25.0 (0.0 – 100.0)             | 0.0 (0.0 – 100.0)          |              |
| Lack of concentration | Mean (SD)                             | 25.7 (27.7)        | 23.9 (25.4)                    | 0.823                      |              |
|                       | Median (Q1 – Q3)                      | 25.0 (0.0 – 100.0) | 25.0 (0.0 – 100.0)             |                            |              |
| Slow thinking         | Mean (SD)                             | 13.9 (22.7)        | 20.5 (28.4)                    | 0.268                      |              |
|                       | Median (Q1 – Q3)                      | 0.0 (0.0 – 75.0)   | 0.0 (0.0 – 100.0)              |                            |              |
| <b>PKU in general</b> | Emotional impact of PKU               | Mean (SD)          | 43.1 (21.6)                    | 45.4 (22.5)                | 0.586        |
|                       |                                       | Median (Q1 – Q3)   | 45.0 (0.0 – 95.0)              | 45.0 (0.0 – 100.0)         |              |
|                       | Practical impact of PKU               | Mean (SD)          | 16.0 (17.0)                    | 18.9 (16.9)                | 0.321        |
|                       |                                       | Median (Q1 – Q3)   | 8.3 (0.0 – 58.3)               | 16.7 (0.0 – 75.0)          |              |
|                       | Social impact of PKU                  | Mean (SD)          | 15.2 (14.1)                    | 19.2 (16.0)                | 0.299        |
|                       |                                       | Median (Q1 – Q3)   | 12.5 (0.0 – 68.8)              | 16.7 (0.0 – 66.7)          |              |
|                       | Overall impact of PKU                 | Mean (SD)          | 27.0 (13.1)                    | 31.5 (16.3)                | 0.379        |
|                       |                                       | Median (Q1 – Q3)   | 25.0 (8.3 – 54.2)              | 28.1 (2.1 – 68.8)          |              |
|                       | Anxiety - Blood test                  | Mean (SD)          | 12.9 (23.1)                    | 9.4 (21.7)                 | 0.211        |
|                       |                                       | Median (Q1 – Q3)   | 0.0 (0.0 – 100.0)              | 0.0 (0.0 – 100.0)          |              |
|                       | Anxiety - Phe levels                  | Mean (SD)          | 36.8 (25.0)                    | 36.6 (28.6)                | 0.914        |
|                       |                                       | Median (Q1 – Q3)   | 25.0 (0.0 – 100.0)             | 25.0 (0.0 – 100.0)         |              |
|                       | Anxiety - Phe levels during pregnancy | Mean (SD)          | 77.2 (23.7)                    | 82.7 (25.0)                | 0.257        |
|                       |                                       | Median (Q1 – Q3)   | 75.0 (25.0 – 100.0)            | 100.0 (0.0 – 100.0)        |              |
|                       | Financial impact of PKU               | Mean (SD)          | 9.7 (17.2)                     | 23.9 (30.3)                | <b>0.017</b> |
|                       |                                       | Median (Q1 – Q3)   | 0.0 (0.0 – 75.0)               | 25.0 (0.0 – 100.0)         |              |
|                       | Information on PKU                    | Mean (SD)          | 34.0 (20.0)                    | 34.3 (26.4)                | 0.777        |
|                       |                                       | Median (Q1 – Q3)   | 25.0 (0.0 – 75.0)              | 25.0 (0.0 – 100.0)         |              |

**Table 1\_c : Comparison of the Adult PKU-QOL scores according to severity of PKU (cont'd)**

| Modules                            | Domains                                                  |                         | Mild-moderate<br>PKU<br>(N=37) | Classical<br>PKU<br>(N=67) | p-value* |
|------------------------------------|----------------------------------------------------------|-------------------------|--------------------------------|----------------------------|----------|
| <b>Supplement administration</b>   | Adherence to supplements                                 | <b>Mean (SD)</b>        | 19.1 (21.8)                    | 20.8 (19.8)                | 0.632    |
|                                    |                                                          | <b>Median (Q1 – Q3)</b> | 8.3 (0.0 – 66.7)               | 16.7 (0.0 – 66.7)          |          |
|                                    | Practical impact of supplements                          | <b>Mean (SD)</b>        | 20.4 (20.3)                    | 22.4 (21.9)                | 0.837    |
|                                    |                                                          | <b>Median (Q1 – Q3)</b> | 12.5 (0.0 – 75.0)              | 18.8 (0.0 – 100.0)         |          |
|                                    | Guilt if poor adherence to supplements                   | <b>Mean (SD)</b>        | 47.4 (32.2)                    | 48.0 (33.4)                | 0.978    |
|                                    |                                                          | <b>Median (Q1 – Q3)</b> | 50.0 (0.0 – 100.0)             | 50.0 (0.0 – 100.0)         |          |
|                                    | Relationships within family because of supplements       | <b>Mean (SD)</b>        | 6.6 (18.3)                     | 12.5 (23.1)                | 0.234    |
|                                    |                                                          | <b>Median (Q1 – Q3)</b> | 0.0 (0.0 – 75.0)               | 0.0 (0.0 – 100.0)          |          |
|                                    | Taste - Supplements                                      | <b>Mean (SD)</b>        | 50.0 (23.6)                    | 49.6 (26.2)                | 0.892    |
|                                    |                                                          | <b>Median (Q1 – Q3)</b> | 50.0 (25.0 – 100.0)            | 50.0 (0.0 – 100.0)         |          |
| <b>Dietary protein restriction</b> | Food temptations                                         | <b>Mean (SD)</b>        | 33.9 (22.0)                    | 35.9 (26.1)                | 0.526    |
|                                    |                                                          | <b>Median (Q1 – Q3)</b> | 37.5 (0.0 – 100.0)             | 50.0 (0.0 – 100.0)         |          |
|                                    | Adherence to dietary protein restriction                 | <b>Mean (SD)</b>        | 14.6 (14.7)                    | 21.7 (19.0)                | 0.150    |
|                                    |                                                          | <b>Median (Q1 – Q3)</b> | 15.0 (0.0 – 43.8)              | 20.0 (0.0 – 56.3)          |          |
|                                    | Social impact of dietary protein-restriction             | <b>Mean (SD)</b>        | 15.7 (17.3)                    | 18.9 (19.0)                | 0.360    |
|                                    |                                                          | <b>Median (Q1 – Q3)</b> | 9.2 (0.0 – 58.3)               | 12.5 (0.0 – 79.2)          |          |
|                                    | Practical impact of dietary protein restriction          | <b>Mean (SD)</b>        | 35.3 (22.0)                    | 35.0 (19.3)                | 0.971    |
|                                    |                                                          | <b>Median (Q1 – Q3)</b> | 32.1 (0.0 – 75.0)              | 35.7 (0.0 – 71.4)          |          |
|                                    | Overall impact of dietary protein restriction            | <b>Mean (SD)</b>        | 26.5 (18.0)                    | 26.6 (17.2)                | 0.987    |
|                                    |                                                          | <b>Median (Q1 – Q3)</b> | 26.1 (0.0 – 67.3)              | 25.0 (0.0 – 75.0)          |          |
|                                    | Taste – low protein food                                 | <b>Mean (SD)</b>        | 35.9 (15.7)                    | 32.5 (22.8)                | 0.409    |
|                                    |                                                          | <b>Median (Q1 – Q3)</b> | 25.0 (25.0 – 75.0)             | 25.0 (0.0 – 100.0)         |          |
|                                    | Food enjoyment                                           | <b>Mean (SD)</b>        | 22.9 (29.4)                    | 27.5 (29.7)                | 0.483    |
|                                    |                                                          | <b>Median (Q1 – Q3)</b> | 25.0 (0.0 – 100.0)             | 25.0 (0.0 – 100.0)         |          |
|                                    | Guilt if dietary protein restriction not followed        | <b>Mean (SD)</b>        | 55.4 (30.1)                    | 53.3 (32.4)                | 0.797    |
|                                    |                                                          | <b>Median (Q1 – Q3)</b> | 50.0 (0.0 – 100.0)             | 50.0 (0.0 – 100.0)         |          |
|                                    | Overall difficulty following dietary protein restriction | <b>Mean (SD)</b>        | 30.2 (30.4)                    | 27.5 (27.3)                | 0.771    |
|                                    |                                                          | <b>Median (Q1 – Q3)</b> | 25.0 (0.0 – 100.0)             | 25.0 (0.0 – 100.0)         |          |

\*Non-parametric P-value for between-group comparisons: Mann-Whitney-Wilcoxon  
In bold p-value<0.05

**Table 1\_d : Comparison of the Parent PKU-QOL scores according to patient's severity of PKU**

| Modules               | Domains                              |                         | Mild-moderate<br>PKU<br>(N=75) | Classical<br>PKU<br>(N=172) | p-value*     |
|-----------------------|--------------------------------------|-------------------------|--------------------------------|-----------------------------|--------------|
| <b>Symptoms</b>       | Child health status                  | <b>Mean (SD)</b>        | 25.0 (21.4)                    | 34.1 (24.8)                 | <b>0.010</b> |
|                       |                                      | <b>Median (Q1 – Q3)</b> | 25.0 (0.0 – 75.0)              | 25.0 (0.0 – 100.0)          |              |
|                       | Headaches                            | <b>Mean (SD)</b>        | 12.0 (19.9)                    | 15.3 (21.1)                 | 0.201        |
|                       |                                      | <b>Median (Q1 – Q3)</b> | 0.0 (0.0 – 75.0)               | 0.0 (0.0 – 75.0)            |              |
|                       | Stomach aches                        | <b>Mean (SD)</b>        | 21.0 (26.6)                    | 17.7 (23.3)                 | 0.482        |
|                       |                                      | <b>Median (Q1 – Q3)</b> | 0.0 (0.0 – 100.0)              | 0.0 (0.0 – 75.0)            |              |
|                       | Tiredness                            | <b>Mean (SD)</b>        | 31.7 (26.4)                    | 31.9 (24.5)                 | 0.753        |
|                       |                                      | <b>Median (Q1 – Q3)</b> | 25.0 (0.0 – 100.0)             | 25.0 (0.0 – 100.0)          |              |
|                       | Irritability                         | <b>Mean (SD)</b>        | 31.0 (26.3)                    | 38.5 (27.8)                 | 0.053        |
|                       |                                      | <b>Median (Q1 – Q3)</b> | 25.0 (0.0 – 100.0)             | 50.0 (0.0 – 100.0)          |              |
|                       | Aggressiveness                       | <b>Mean (SD)</b>        | 10.6 (17.6)                    | 14.0 (23.5)                 | 0.663        |
|                       |                                      | <b>Median (Q1 – Q3)</b> | 0.0 (0.0 – 75.0)               | 0.0 (0.0 – 100.0)           |              |
|                       | Moodiness                            | <b>Mean (SD)</b>        | 27.7 (25.7)                    | 27.9 (25.7)                 | 0.988        |
|                       |                                      | <b>Median (Q1 – Q3)</b> | 25.0 (0.0 – 100.0)             | 25.0 (0.0 – 100.0)          |              |
|                       | Sadness                              | <b>Mean (SD)</b>        | 16.1 (20.6)                    | 19.0 (21.5)                 | 0.287        |
|                       |                                      | <b>Median (Q1 – Q3)</b> | 0.0 (0.0 – 75.0)               | 25.0 (0.0 – 100.0)          |              |
|                       | Anxiety                              | <b>Mean (SD)</b>        | 12.7 (20.0)                    | 14.5 (22.3)                 | 0.634        |
|                       |                                      | <b>Median (Q1 – Q3)</b> | 0.0 (0.0 – 75.0)               | 0.0 (0.0 – 100.0)           |              |
|                       | Lack of concentration                | <b>Mean (SD)</b>        | 29.1 (29.3)                    | 30.2 (27.3)                 | 0.634        |
|                       |                                      | <b>Median (Q1 – Q3)</b> | 25.0 (0.0 – 100.0)             | 25.0 (0.0 – 100.0)          |              |
| Slow thinking         | <b>Mean (SD)</b>                     | 17.1 (25.0)             | 20.4 (26.7)                    | 0.337                       |              |
|                       | <b>Median (Q1 – Q3)</b>              | 0.0 (0.0 – 100.0)       | 0.0 (0.0 – 100.0)              |                             |              |
| <b>PKU in general</b> | Emotional impact of PKU              | <b>Mean (SD)</b>        | 37.5 (21.3)                    | 44.9 (23.2)                 | <b>0.023</b> |
|                       |                                      | <b>Median (Q1 – Q3)</b> | 34.4 (0.0 – 87.5)              | 43.8 (0.0 – 100.0)          |              |
|                       | Practical impact of PKU              | <b>Mean (SD)</b>        | 10.0 (12.1)                    | 16.3 (15.2)                 | <b>0.003</b> |
|                       |                                      | <b>Median (Q1 – Q3)</b> | 5.0 (0.0 – 41.7)               | 12.5 (0.0 – 70.0)           |              |
|                       | Social impact of PKU                 | <b>Mean (SD)</b>        | 13.8 (12.3)                    | 18.5 (18.1)                 | 0.163        |
|                       |                                      | <b>Median (Q1 – Q3)</b> | 10.0 (0.0 – 50.0)              | 15.0 (0.0 – 90.0)           |              |
|                       | Overall impact of PKU                | <b>Mean (SD)</b>        | 19.2 (12.5)                    | 25.9 (16.2)                 | <b>0.004</b> |
|                       |                                      | <b>Median (Q1 – Q3)</b> | 18.3 (0.0 – 50.0)              | 23.2 (0.0 – 76.9)           |              |
|                       | Child anxiety - Blood test           | <b>Mean (SD)</b>        | 20.4 (27.9)                    | 25.0 (27.9)                 | 0.144        |
|                       |                                      | <b>Median (Q1 – Q3)</b> | 12.5 (0.0 – 100.0)             | 12.5 (0.0 – 100.0)          |              |
|                       | Impact of child anxiety - Blood test | <b>Mean (SD)</b>        | 23.1 (29.5)                    | 25.1 (28.3)                 | 0.431        |
|                       |                                      | <b>Median (Q1 – Q3)</b> | 12.5 (0.0 – 100.0)             | 12.5 (0.0 – 100.0)          |              |
|                       | Anxiety - Phe levels                 | <b>Mean (SD)</b>        | 52.4 (31.0)                    | 56.3 (32.6)                 | 0.352        |
|                       |                                      | <b>Median (Q1 – Q3)</b> | 50.0 (0.0 – 100.0)             | 50.0 (0.0 – 100.0)          |              |
|                       | Financial impact of PKU              | <b>Mean (SD)</b>        | 17.8 (24.5)                    | 30.0 (30.3)                 | <b>0.003</b> |
|                       |                                      | <b>Median (Q1 – Q3)</b> | 0.0 (0.0 – 100.0)              | 25.0 (0.0 – 100.0)          |              |
|                       | Information on PKU                   | <b>Mean (SD)</b>        | 29.1 (21.1)                    | 32.5 (26.0)                 | 0.391        |
|                       |                                      | <b>Median (Q1 – Q3)</b> | 25.0 (0.0 – 100.0)             | 25.0 (0.0 – 100.0)          |              |

**Table 1\_d : Comparison of the Parent PKU-QOL scores according to patient's severity of PKU (cont'd)**

| Modules                            | Domains                                            |                         | Mild-moderate<br>PKU<br>(N=75) | Classical<br>PKU<br>(N=172) | p-value*     |
|------------------------------------|----------------------------------------------------|-------------------------|--------------------------------|-----------------------------|--------------|
| <b>Supplement administration</b>   | Adherence to supplements                           | <b>Mean (SD)</b>        | 10.7 (16.1)                    | 11.8 (18.9)                 | 0.871        |
|                                    |                                                    | <b>Median (Q1 – Q3)</b> | 0.0 (0.0 – 50.0)               | 0.0 (0.0 – 100.0)           |              |
|                                    | Management of supplements                          | <b>Mean (SD)</b>        | 16.3 (27.3)                    | 18.0 (27.7)                 | 0.605        |
|                                    |                                                    | <b>Median (Q1 – Q3)</b> | 0.0 (0.0 – 100.0)              | 0.0 (0.0 – 100.0)           |              |
|                                    | Practical impact of supplements                    | <b>Mean (SD)</b>        | 14.5 (19.0)                    | 22.5 (24.4)                 | <b>0.041</b> |
|                                    |                                                    | <b>Median (Q1 – Q3)</b> | 8.3 (0.0 – 75.0)               | 16.7 (0.0 – 100.0)          |              |
|                                    | Guilt if poor adherence to supplements             | <b>Mean (SD)</b>        | 54.0 (30.5)                    | 52.7 (35.4)                 | 0.863        |
|                                    |                                                    | <b>Median (Q1 – Q3)</b> | 50.0 (0.0 – 100.0)             | 50.0 (0.0 – 100.0)          |              |
|                                    | Relationships within family because of supplements | <b>Mean (SD)</b>        | 19.9 (26.0)                    | 18.9 (26.4)                 | 0.739        |
|                                    |                                                    | <b>Median (Q1 – Q3)</b> | 0.0 (0.0 – 75.0)               | 0.0 (0.0 – 100.0)           |              |
| <b>Dietary protein restriction</b> | Adherence to dietary protein restriction           | <b>Mean (SD)</b>        | 8.7 (20.9)                     | 14.9 (25.6)                 | 0.098        |
|                                    |                                                    | <b>Median (Q1 – Q3)</b> | 0.0 (0.0 – 100.0)              | 0.0 (0.0 – 100.0)           |              |
|                                    | Management of dietary protein restriction          | <b>Mean (SD)</b>        | 19.7 (18.2)                    | 26.4 (23.0)                 | 0.099        |
|                                    |                                                    | <b>Median (Q1 – Q3)</b> | 16.7 (0.0 – 70.8)              | 20.8 (0.0 – 100.0)          |              |
|                                    | Practical impact of dietary protein restriction    | <b>Mean (SD)</b>        | 26.7 (16.3)                    | 33.7 (21.7)                 | 0.070        |
|                                    |                                                    | <b>Median (Q1 – Q3)</b> | 28.6 (0.0 – 64.3)              | 32.7 (0.0 – 82.1)           |              |
|                                    | Child food enjoyment                               | <b>Mean (SD)</b>        | 11.2 (17.0)                    | 23.0 (25.7)                 | <b>0.003</b> |
|                                    |                                                    | <b>Median (Q1 – Q3)</b> | 0.0 (0.0 – 75.0)               | 25.0 (0.0 – 100.0)          |              |
|                                    | Guilt if dietary protein restriction not followed  | <b>Mean (SD)</b>        | 41.2 (30.4)                    | 46.7 (37.0)                 | 0.431        |
|                                    |                                                    | <b>Median (Q1 – Q3)</b> | 25.0 (0.0 – 100.0)             | 50.0 (0.0 – 100.0)          |              |

\*Non-parametric P-value for between-group comparisons: Mann-Whitney-Wilcoxon  
In bold p-value<0.05
