# Supplementary material for: Assessment of the impact of phenylketonuria and its treatment on quality of life of patients and parents from seven European countries
Source: Springer Nature journal article supplement (doi:10.1186/s13023-015-0294-x), 2015-06-17
Supplement: MOESM2 [file 9776166]

**Additional File 2 : Comparison of PKU-QOL scores according to overall assessment of health status**

**Table 2\_a : Comparison of the Child PKU-QOL scores according to overall assessment of health status**

| <b>Modules</b>        | <b>Domains</b>          |                         | <b>Poor<br/>(N=0)</b> | <b>Fair<br/>(N=2)</b> | <b>Good<br/>(N=19)</b> | <b>Very good<br/>(N=41)</b> | <b>Excellent<br/>(N=28)</b> | <b>p-value*</b> |
|-----------------------|-------------------------|-------------------------|-----------------------|-----------------------|------------------------|-----------------------------|-----------------------------|-----------------|
| <b>Symptoms</b>       | Headaches               | <b>Mean (SD)</b>        | na                    | 12.5 (17.7)           | 16.7 (17.1)            | 13.1 (18.8)                 | 19.2 (28.6)                 | 0.829           |
|                       |                         | <b>Median (Q1 – Q3)</b> | na                    | 12.5 (0.0 – 25.0)     | 25.0 (0.0 – 50.0)      | 0.0 (0.0 – 50.0)            | 0.0 (0.0 – 100.0)           |                 |
|                       | Stomach aches           | <b>Mean (SD)</b>        | na                    | 50.0 (70.7)           | 15.3 (21.2)            | 17.5 (22.1)                 | 10.6 (17.6)                 | 0.518           |
|                       |                         | <b>Median (Q1 – Q3)</b> | na                    | 50.0 (0.0 – 100.0)    | 0.0 (0.0 – 75.0)       | 0.0 (0.0 – 75.0)            | 0.0 (0.0 – 50.0)            |                 |
|                       | Tiredness               | <b>Mean (SD)</b>        | na                    | 62.5 (53.0)           | 38.9 (24.6)            | 30.6 (26.2)                 | 36.5 (26.7)                 | 0.382           |
|                       |                         | <b>Median (Q1 – Q3)</b> | na                    | 62.5 (25.0 – 100.0)   | 50.0 (0.0 – 75.0)      | 25.0 (0.0 – 100.0)          | 50.0 (0.0 – 100.0)          |                 |
|                       | Irritability            | <b>Mean (SD)</b>        | na                    | 50.0 (70.7)           | 16.7 (24.3)            | 21.3 (29.7)                 | 15.4 (26.5)                 | 0.738           |
|                       |                         | <b>Median (Q1 – Q3)</b> | na                    | 50.0 (0.0 – 100.0)    | 0.0 (0.0 – 75.0)       | 0.0 (0.0 – 100.0)           | 0.0 (0.0 – 100.0)           |                 |
|                       | Aggressiveness          | <b>Mean (SD)</b>        | na                    | 50.0 (70.7)           | 18.1 (30.7)            | 11.3 (20.4)                 | 7.7 (17.0)                  | 0.534           |
|                       |                         | <b>Median (Q1 – Q3)</b> | na                    | 50.0 (0.0 – 100.0)    | 0.0 (0.0 – 100.0)      | 0.0 (0.0 – 75.0)            | 0.0 (0.0 – 75.0)            |                 |
|                       | Moodiness               | <b>Mean (SD)</b>        | na                    | 50.0 (70.7)           | 11.1 (19.6)            | 21.3 (24.4)                 | 11.5 (19.0)                 | 0.205           |
|                       |                         | <b>Median (Q1 – Q3)</b> | na                    | 50.0 (0.0 – 100.0)    | 0.0 (0.0 – 50.0)       | 12.5 (0.0 – 75.0)           | 0.0 (0.0 – 50.0)            |                 |
|                       | Sadness                 | <b>Mean (SD)</b>        | na                    | 62.5 (53.0)           | 9.7 (15.2)             | 18.8 (25.8)                 | 14.8 (18.7)                 | 0.180           |
|                       |                         | <b>Median (Q1 – Q3)</b> | na                    | 62.5 (25.0 - 100.0)   | 0.0 (0.0 – 50.0)       | 0.0 (0.0 – 100.0)           | 0.0 (0.0 – 50.0)            |                 |
|                       | Anxiety                 | <b>Mean (SD)</b>        | na                    | 25.0 (35.4)           | 5.6 (13.7)             | 11.9 (20.4)                 | 6.7 (16.7)                  | 0.347           |
|                       |                         | <b>Median (Q1 – Q3)</b> | na                    | 25.0 (0.0 – 50.0)     | 0.0 (0.0 – 50.0)       | 0.0 (0.0 – 75.0)            | 0.0 (0.0 – 50.0)            |                 |
|                       | Lack of concentration   | <b>Mean (SD)</b>        | na                    | 50.0 (35.4)           | 20.6 (28.3)            | 21.3 (26.2)                 | 23.0 (31.4)                 | 0.539           |
|                       |                         | <b>Median (Q1 – Q3)</b> | na                    | 50.0 (25.0 – 75.0)    | 25.0 (0.0 – 100.0)     | 0.0 (0.0 – 75.0)            | 0.0 (0.0 – 100.0)           |                 |
| Slow thinking         | <b>Mean (SD)</b>        | na                      | 37.5 (17.7)           | 26.5 (22.5)           | 23.5 (31.2)            | 19.0 (22.0)                 | 0.453                       |                 |
|                       | <b>Median (Q1 – Q3)</b> | na                      | 37.5 (25.0 – 50.0)    | 25.0 (0.0 – 75.0)     | 0.0 (0.0 – 100.0)      | 25.0 (0.0 – 75.0)           |                             |                 |
| <b>PKU in general</b> | Emotional impact of PKU | <b>Mean (SD)</b>        | na                    | 41.7 (23.6)           | 38.0 (24.5)            | 32.7 (23.3)                 | 30.1 (18.0)                 | 0.690           |
|                       |                         | <b>Median (Q1 – Q3)</b> | na                    | 41.7 (25.0 – 58.3)    | 37.5 (0.0 – 75.0)      | 29.2 (0.0 – 83.3)           | 29.2 (0.0 – 66.7)           |                 |
|                       | Practical impact of PKU | <b>Mean (SD)</b>        | na                    | 25.0 (35.4)           | 9.0 (12.7)             | 11.3 (18.5)                 | 11.6 (16.2)                 | 0.900           |
|                       |                         | <b>Median (Q1 – Q3)</b> | na                    | 25.0 (0.0 – 50.0)     | 0.0 (0.0 – 37.5)       | 0.0 (0.0 – 75.0)            | 0.0 (0.0 – 50.0)            |                 |
|                       | Social impact of PKU    | <b>Mean (SD)</b>        | na                    | 37.5 (29.5)           | 23.6 (12.9)            | 21.5 (21.5)                 | 13.5 (12.5)                 | 0.086           |
|                       |                         | <b>Median (Q1 – Q3)</b> | na                    | 37.5 (16.7 – 58.3)    | 25.0 (0.0 – 50.0)      | 16.7 (0.0 – 91.7)           | 8.3 (0.0 – 33.3)            |                 |
|                       | Overall impact of PKU   | <b>Mean (SD)</b>        | na                    | 35.9 (11.0)           | 25.3 (12.4)            | 23.1 (17.9)                 | 19.2 (12.2)                 | 0.161           |
|                       |                         | <b>Median (Q1 – Q3)</b> | na                    | 35.9 (28.1 – 43.8)    | 28.1 (0.0 – 43.8)      | 18.8 (0.0 – 78.1)           | 17.2 (0.0 – 46.9)           |                 |
|                       | Anxiety - Blood test    | <b>Mean (SD)</b>        | na                    | 0.0 (0.0)             | 13.2 (21.4)            | 14.7 (17.2)                 | 9.7 (13.6)                  | 0.266           |
|                       |                         | <b>Median (Q1 – Q3)</b> | na                    | 0.0 (0.0 – 0.0)       | 0.0 (0.0 – 50.0)       | 12.5 (0.0 – 62.5)           | 0.0 (0.0 – 50.0)            |                 |
|                       | Anxiety - Phe levels    | <b>Mean (SD)</b>        | na                    | 50.0 (35.4)           | 40.3 (31.1)            | 48.8 (38.4)                 | 44.4 (39.4)                 | 0.902           |
|                       |                         | <b>Median (Q1 – Q3)</b> | na                    | 50.0 (25.0 – 75.0)    | 25.0 (0.0 – 100.0)     | 50.0 (0.0 – 100.0)          | 50.0 (0.0 – 100.0)          |                 |

**Table 2\_a : Comparison of the Child PKU-QOL scores according to overall assessment of health status (cont'd)**

| Modules                            | Domains                                                  |                         | Poor<br>(N=0) | Fair<br>(N=2)       | Good<br>(N=19)     | Very good<br>(N=41) | Excellent<br>(N=28) | p-value* |
|------------------------------------|----------------------------------------------------------|-------------------------|---------------|---------------------|--------------------|---------------------|---------------------|----------|
| <b>Supplement administration</b>   | Adherence to supplements                                 | <b>Mean (SD)</b>        | na            | 50.0 (70.7)         | 8.8 (13.1)         | 10.9 (15.2)         | 9.9 (14.3)          | 0.871    |
|                                    |                                                          | <b>Median (Q1 – Q3)</b> | na            | 50.0 (0.0 – 100.0)  | 0.0 (0.0 – 37.5)   | 0.0 (0.0 – 50.0)    | 0.0 (0.0 – 50.0)    |          |
|                                    | Practical impact of supplements                          | <b>Mean (SD)</b>        | na            | 50.0 (70.7)         | 26.5 (40.0)        | 17.3 (29.3)         | 13.0 (25.1)         | 0.571    |
|                                    |                                                          | <b>Median (Q1 – Q3)</b> | na            | 50.0 (0.0 – 100.0)  | 0.0 (0.0 – 100.0)  | 0.0 (0.0 – 100.0)   | 0.0 (0.0 – 75.0)    |          |
|                                    | Guilt if poor adherence to supplements                   | <b>Mean (SD)</b>        | na            | 12.5 (17.7)         | 41.2 (35.3)        | 51.3 (39.0)         | 41.3 (40.3)         | 0.444    |
|                                    |                                                          | <b>Median (Q1 – Q3)</b> | na            | 12.5 (0.0 – 25.0)   | 25.0 (0.0 – 100.0) | 50.0 (0.0 – 100.0)  | 25.0 (0.0 – 100.0)  |          |
|                                    | Relationships within family because of supplements       | <b>Mean (SD)</b>        | na            | 25.0 (35.4)         | 7.4 (14.7)         | 13.5 (27.4)         | 4.0 (11.8)          | 0.364    |
|                                    |                                                          | <b>Median (Q1 – Q3)</b> | na            | 25.0 (0.0 – 50.0)   | 0.0 (0.0 – 50.0)   | 0.0 (0.0 – 100.0)   | 0.0 (0.0 – 50.0)    |          |
|                                    | Taste - Supplements                                      | <b>Mean (SD)</b>        | na            | 0.0 (0.0)           | 29.4 (29.6)        | 32.7 (29.9)         | 47.8 (32.8)         | 0.063    |
|                                    |                                                          | <b>Median (Q1 – Q3)</b> | na            | 0.0 (0.0 – 0.0)     | 25.0 (0.0 – 100.0) | 25.0 (0.0 – 100.0)  | 50.0 (0.0 – 100.0)  |          |
| <b>Dietary protein restriction</b> | Food temptations                                         | <b>Mean (SD)</b>        | na            | 31.3 (8.8)          | 23.4 (29.2)        | 30.1 (27.8)         | 34.1 (28.2)         | 0.545    |
|                                    |                                                          | <b>Median (Q1 – Q3)</b> | na            | 31.3 (25.0 – 37.5)  | 18.8 (0.0 – 100.0) | 25.0 (0.0 – 100.0)  | 31.3 (0.0 – 87.5)   |          |
|                                    | Adherence to dietary protein restriction                 | <b>Mean (SD)</b>        | na            | 37.5 (17.7)         | 9.4 (13.3)         | 11.2 (16.4)         | 7.4 (16.7)          | 0.059    |
|                                    |                                                          | <b>Median (Q1 – Q3)</b> | na            | 37.5 (25.0 – 50.0)  | 0.0 (0.0 – 37.5)   | 0.0 (0. – 62.5)     | 0.0 (0.0 – 62.5)    |          |
|                                    | Social impact of dietary protein restriction             | <b>Mean (SD)</b>        | na            | 22.5 (24.7)         | 21.1 (19.3)        | 19.2 (19.6)         | 17.0 (17.8)         | 0.884    |
|                                    |                                                          | <b>Median (Q1 – Q3)</b> | na            | 22.5 (5.0 – 40.0)   | 17.5 (0.0 – 62.5)  | 15.0 (0.0 – 80.0)   | 15.0 (0.0 – 60.0)   |          |
|                                    | Taste – low protein food                                 | <b>Mean (SD)</b>        | na            | 0.0 (0.0)           | 17.2 (19.8)        | 20.3 (21.9)         | 18.2 (29.1)         | 0.390    |
|                                    |                                                          | <b>Median (Q1 – Q3)</b> | na            | 0.0 (0.0 – 0.0)     | 12.5 (0.0 – 50.0)  | 25.0 (0.0 – 100.0)  | 0.0 (0.0 – 100.0)   |          |
|                                    | Food enjoyment                                           | <b>Mean (SD)</b>        | na            | 50.0 (70.7)         | 11.1 (15.4)        | 20.6 (22.6)         | 13.9 (24.4)         | 0.268    |
|                                    |                                                          | <b>Median (Q1 – Q3)</b> | na            | 50.0 (0.0 – 100.0)  | 0.0 (0.0 – 50.0)   | 25.0 (0.0 – 75.0)   | 0.0 (0.0 – 100.0)   |          |
|                                    | Guilt if dietary protein restriction not followed        | <b>Mean (SD)</b>        | na            | 62.5 (53.0)         | 57.8 (35.0)        | 53.9 (41.3)         | 49.0 (44.8)         | 0.870    |
|                                    |                                                          | <b>Median (Q1 – Q3)</b> | na            | 62.5 (25.0 – 100.0) | 62.5 (0.0 – 100.0) | 50.0 (0.0 – 100.0)  | 50.0 (0.0 – 100.0)  |          |
|                                    | Overall difficulty following dietary protein restriction | <b>Mean (SD)</b>        | na            | 0.0 (0.0)           | 18.8 (23.3)        | 21.2 (27.2)         | 17.6 (32.4)         | 0.362    |
|                                    |                                                          | <b>Median (Q1 – Q3)</b> | na            | 0.0 (0.0 – 0.0)     | 12.5 (0.0 – 75.0)  | 25.0 (0.0 – 100.0)  | 0.0 (0.0 – 100.0)   |          |

\*Non-parametric P-value for between-group comparisons: Kruskal-Wallis  
In bold p-value<0.05

**Table 2\_b : Comparison of the Adolescent PKU-QOL scores according to overall assessment of health status**

| Modules               | Domains                  |                         | Poor<br>(N=0) | Fair<br>(N=0)     | Good<br>(N=38)     | Very good<br>(N=42) | Excellent<br>(N=30) | p-value*     |
|-----------------------|--------------------------|-------------------------|---------------|-------------------|--------------------|---------------------|---------------------|--------------|
| <b>Symptoms</b>       | Self-rated status health | <b>Mean (SD)</b>        | na            | na                | 39.3 (21.3)        | 41.3 (23.0)         | 20.8 (24.6)         | <b>0.001</b> |
|                       |                          | <b>Median (Q1 – Q3)</b> | na            | na                | 50.0 (0.0 – 75.0)  | 50.0 (0.0 – 75.0)   | 12.5 (0.0 – 75.0)   |              |
|                       | Headaches                | <b>Mean (SD)</b>        | na            | na                | 18.6 (24.5)        | 20.6 (25.2)         | 20.8 (27.1)         | 0.908        |
|                       |                          | <b>Median (Q1 – Q3)</b> | na            | na                | 0.0 (0.0 – 75.0)   | 12.5 (0.0 – 100.0)  | 12.5 (0.0 – 100.0)  |              |
|                       | Stomach aches            | <b>Mean (SD)</b>        | na            | na                | 16.4 (21.8)        | 15.6 (20.2)         | 10.8 (21.5)         | 0.355        |
|                       |                          | <b>Median (Q1 – Q3)</b> | na            | na                | 0.0 (0.0 – 75.0)   | 0.0 (0.0 – 75.0)    | 0.0 (0.0 – 100.0)   |              |
|                       | Tiredness                | <b>Mean (SD)</b>        | na            | na                | 43.6 (28.0)        | 41.9 (23.6)         | 35.0 (26.7)         | 0.264        |
|                       |                          | <b>Median (Q1 – Q3)</b> | na            | na                | 50.0 (0.0 – 100.0) | 50.0 (0.0 – 100.0)  | 25.0 (0.0 – 100.0)  |              |
|                       | Irritability             | <b>Mean (SD)</b>        | na            | na                | 32.9 (26.3)        | 20.2 (25.4)         | 21.7 (24.3)         | 0.062        |
|                       |                          | <b>Median (Q1 – Q3)</b> | na            | na                | 50.0 (0.0 – 75.0)  | 0.0 (0.0 – 75.0)    | 25.0 (0.0 – 100.0)  |              |
|                       | Aggressiveness           | <b>Mean (SD)</b>        | na            | na                | 17.1 (26.3)        | 11.3 (24.2)         | 6.7 (13.0)          | 0.305        |
|                       |                          | <b>Median (Q1 – Q3)</b> | na            | na                | 0.0 (0.0 – 75.0)   | 0.0 (0.0 – 100.0)   | 0.0 (0.0 – 50.0)    |              |
|                       | Moodiness                | <b>Mean (SD)</b>        | na            | na                | 24.3 (24.6)        | 16.7 (21.9)         | 19.2 (21.5)         | 0.337        |
|                       |                          | <b>Median (Q1 – Q3)</b> | na            | na                | 25.0 (0.0 – 75.0)  | 0.0 (0.0 – 75.0)    | 12.5 (0.0 – 50.0)   |              |
| Sadness               | <b>Mean (SD)</b>         | na                      | na            | 14.3 (20.4)       | 11.9 (20.1)        | 10.0 (18.1)         | 0.570               |              |
|                       | <b>Median (Q1 – Q3)</b>  | na                      | na            | 0.0 (0.0 – 75.0)  | 0.0 (0.0 – 50.0)   | 0.0 (0.0 – 50.0)    |                     |              |
| Anxiety               | <b>Mean (SD)</b>         | na                      | na            | 20.0 (25.6)       | 10.7 (20.0)        | 11.7 (25.2)         | 0.077               |              |
|                       | <b>Median (Q1 – Q3)</b>  | na                      | na            | 0.0 (0.0 – 100.0) | 0.0 (0.0 – 75.0)   | 0.0 (0.0 – 100.0)   |                     |              |
| Lack of concentration | <b>Mean (SD)</b>         | na                      | na            | 25.7 (22.3)       | 16.7 (23.9)        | 16.7 (26.5)         | 0.057               |              |
|                       | <b>Median (Q1 – Q3)</b>  | na                      | na            | 25.0 (0.0 – 75.0) | 0.0 (0.0 – 75.0)   | 0.0 (0.0 – 100.0)   |                     |              |
| Slow thinking         | <b>Mean (SD)</b>         | na                      | na            | 15.7 (19.3)       | 11.9 (20.1)        | 14.2 (20.4)         | 0.549               |              |
|                       | <b>Median (Q1 – Q3)</b>  | na                      | na            | 0.0 (0.0 – 50.0)  | 0.0 (0.0 – 75.0)   | 0.0 (0.0 – 50.0)    |                     |              |
| <b>PKU in general</b> | Emotional impact of PKU  | <b>Mean (SD)</b>        | na            | na                | 38.9 (23.0)        | 28.2 (17.6)         | 29.7 (17.2)         | 0.165        |
|                       |                          | <b>Median (Q1 – Q3)</b> | na            | na                | 30.0 (0.0 – 90.0)  | 30.0 (0.0 – 70.0)   | 30.0 (0.0 – 70.0)   |              |
|                       | Practical impact of PKU  | <b>Mean (SD)</b>        | na            | na                | 19.3 (17.1)        | 9.0 (11.0)          | 8.3 (11.2)          | 0.095        |
|                       |                          | <b>Median (Q1 – Q3)</b> | na            | na                | 16.7 (0.0 – 50.0)  | 8.3 (0.0 – 33.3)    | 8.3 (0.0 – 33.3)    |              |
|                       | Social impact of PKU     | <b>Mean (SD)</b>        | na            | na                | 18.1 (18.1)        | 14.8 (12.7)         | 13.8 (11.6)         | 0.723        |
|                       |                          | <b>Median (Q1 – Q3)</b> | na            | na                | 16.7 (0.0 – 91.7)  | 8.3 (0.0 – 50.0)    | 8.3 (0.0 – 33.3)    |              |
|                       | Overall impact of PKU    | <b>Mean (SD)</b>        | na            | na                | 28.4 (18.8)        | 19.9 (12.1)         | 20.2 (12.7)         | 0.093        |
|                       |                          | <b>Median (Q1 – Q3)</b> | na            | na                | 25.0 (0.0 – 85.0)  | 20.0 (2.3 – 50.0)   | 17.5 (0.0 – 55.0)   |              |
|                       | Anxiety - Blood test     | <b>Mean (SD)</b>        | na            | na                | 13.6 (25.3)        | 9.8 (19.5)          | 9.2 (16.1)          | 0.990        |
|                       |                          | <b>Median (Q1 – Q3)</b> | na            | na                | 0.0 (0.0 – 100.0)  | 0.0 (0.0 – 87.5)    | 0.0 (0.0 – 50.0)    |              |
|                       | Anxiety - Phe levels     | <b>Mean (SD)</b>        | na            | na                | 40.7 (33.3)        | 33.5 (31.9)         | 32.5 (29.5)         | 0.530        |
|                       |                          | <b>Median (Q1 – Q3)</b> | na            | na                | 50.0 (0.0 – 100.0) | 25.0 (0.0 – 100.0)  | 25.0 (0.0 – 100.0)  |              |

**Table 2\_b : Comparison of the Adolescent PKU-QOL scores according to overall assessment of health status (cont'd)**

| Modules                                                  | Domains                                            |                  | Poor<br>(N=0) | Fair<br>(N=0)      | Good<br>(N=38)     | Very good<br>(N=42) | Excellent<br>(N=30) | p-value* |
|----------------------------------------------------------|----------------------------------------------------|------------------|---------------|--------------------|--------------------|---------------------|---------------------|----------|
| Supplement administration                                | Adherence to supplements                           | Mean (SD)        | na            | na                 | 21.4 (25.1)        | 11.1 (12.9)         | 11.5 (16.4)         | 0.239    |
|                                                          |                                                    | Median (Q1 – Q3) | na            | na                 | 8.3 (0.0 – 83.3)   | 6.3 (0.0 – 50.0)    | 6.3 (0.0 -66.7)     |          |
|                                                          | Practical impact of supplements                    | Mean (SD)        | na            | na                 | 24.0 (28.6)        | 14.2 (16.9)         | 20.3 (24.4)         | 0.447    |
|                                                          |                                                    | Median (Q1 – Q3) | na            | na                 | 12.5 (0.0 – 100.0) | 12.5 (0.0 – 62.5)   | 6.3 (0.0 – 75.0)    |          |
|                                                          | Guilt if poor adherence to supplements             | Mean (SD)        | na            | na                 | 40.3 (34.0)        | 43.9 (37.5)         | 46.2 (36.5)         | 0.859    |
|                                                          |                                                    | Median (Q1 – Q3) | na            | na                 | 25.0 (0.0 – 100.0) | 25.0 (0.0 – 100.0)  | 50.0 (0.0 – 100.0)  |          |
|                                                          | Relationships within family because of supplements | Mean (SD)        | na            | na                 | 14.8 (28.3)        | 14.9 (26.0)         | 13.0 (20.6)         | 0.983    |
|                                                          |                                                    | Median (Q1 – Q3) | na            | na                 | 0.0 (0.0 – 100.0)  | 0.0 (0.0 – 100.0)   | 0.0 (0.0 – 50.0)    |          |
|                                                          | Taste - Supplements                                | Mean (SD)        | na            | na                 | 44.5 (26.0)        | 39.9 (23.2)         | 38.0 (26.1)         | 0.634    |
|                                                          |                                                    | Median (Q1 – Q3) | na            | na                 | 50.0 (0.0 – 100.0) | 50.0 (0.0 – 100.0)  | 50.0 (0.0 – 100.0)  |          |
| Dietary protein restriction                              | Food temptations                                   | Mean (SD)        | na            | na                 | 30.8 (31.6)        | 27.0 (26.4)         | 19.6 (25.5)         | 0.360    |
|                                                          |                                                    | Median (Q1 – Q3) | na            | na                 | 25.0 (0.0 – 100.0) | 25.0 (0.0 – 100.0)  | 12.5 (0.0 – 87.5)   |          |
|                                                          | Adherence to dietary protein restriction           | Mean (SD)        | na            | na                 | 21.3 (25.6)        | 10.7 (12.4)         | 7.6 (12.6)          | 0.083    |
|                                                          |                                                    | Median (Q1 – Q3) | na            | na                 | 12.5 (0.0 – 83.3)  | 8.3 (0.0 – 50.0)    | 0.0 (0.0 – 50.0)    |          |
|                                                          | Practical impact of dietary protein restriction    | Mean (SD)        | na            | na                 | 30.7 (21.8)        | 24.6 (16.4)         | 25.9 (14.7)         | 0.659    |
|                                                          |                                                    | Median (Q1 – Q3) | na            | na                 | 26.8 (0.0 – 85.7)  | 24.3 (0.0 – 64.3)   | 28.6 (0.0 – 67.9)   |          |
|                                                          | Social impact of dietary protein restriction       | Mean (SD)        | na            | na                 | 19.4 (25.2)        | 11.1 (18.3)         | 10.7 (15.2)         | 0.356    |
|                                                          |                                                    | Median (Q1 – Q3) | na            | na                 | 7.5 (0.0 – 90.0)   | 5.0 (0.0 – 80.0)    | 5.0 (0.0 – 65.0)    |          |
|                                                          | Overall impact of dietary protein restriction      | Mean (SD)        | na            | na                 | 26.0 (21.1)        | 17.2 (15.1)         | 18.3 (12.8)         | 0.177    |
|                                                          |                                                    | Median (Q1 – Q3) | na            | na                 | 19.4 (0.0 – 86.4)  | 13.1 (0.0 – 59.1)   | 18.2 (0.0 – 52.3)   |          |
|                                                          | Taste – low protein food                           | Mean (SD)        | na            | na                 | 33.1 (31.2)        | 19.1 (17.5)         | 26.3 (25.6)         | 0.228    |
|                                                          |                                                    | Median (Q1 – Q3) | na            | na                 | 25.0 (0.0 – 100.0) | 25.0 (0.0 – 50.0)   | 25.0 (0.0 – 100.0)  |          |
|                                                          | Food enjoyment                                     | Mean (SD)        | na            | na                 | 15.8 (26.7)        | 14.2 (26.7)         | 19.6 (27.1)         | 0.461    |
|                                                          |                                                    | Median (Q1 – Q3) | na            | na                 | 0.0 (0.0 – 100.0)  | 0.0 (0.0 – 100.0)   | 0.0 (0.0 – 100.0)   |          |
| Guilt if dietary protein restriction not followed        | Mean (SD)                                          | na               | na            | 44.4 (35.8)        | 50.6 (38.3)        | 42.4 (30.6)         | 0.657               |          |
|                                                          | Median (Q1 – Q3)                                   | na               | na            | 50.0 (0.0 – 100.0) | 50.0 (0.0 – 100.0) | 50.0 (0.0 – 100.0)  |                     |          |
| Overall difficulty following dietary protein restriction | Mean (SD)                                          | na               | na            | 21.2 (30.1)        | 15.8 (23.6)        | 13.0 (26.0)         | 0.458               |          |
|                                                          | Median (Q1 – Q3)                                   | na               | na            | 0.0 (0.0 – 100.0)  | 0.0 (0.0 – 100.0)  | 0.0 (0.0 – 100.0)   |                     |          |

\*Non-parametric P-value for between-group comparisons: Kruskal-Wallis  
In bold p-value<0.05

**Table 2\_c : Comparison of the Adult PKU-QOL scores according to overall assessment of health status**

| Modules               | Domains                  | Poor<br>(N=0)           | Fair<br>(N=3)      | Good<br>(N=28)      | Very good<br>(N=46) | Excellent<br>(N=26) | p-value*          |                  |
|-----------------------|--------------------------|-------------------------|--------------------|---------------------|---------------------|---------------------|-------------------|------------------|
| <b>Symptoms</b>       | Self-rated health status | <b>Mean (SD)</b>        | na                 | 66.7 (28.9)         | 46.3 (16.6)         | 30.4 (21.0)         | 22.1 (22.7)       | <b>&lt;0.001</b> |
|                       |                          | <b>Median (Q1 – Q3)</b> | na                 | 50.0 (50.0 – 100.0) | 50.0 (25.0 – 75.0)  | 25.0 (0.0 – 75.0)   | 25.0 (0.0 – 50.0) |                  |
| Headaches             | <b>Mean (SD)</b>         | na                      | 33.3 (28.9)        | 26.9 (25.4)         | 19.0 (24.3)         | 18.3 (20.7)         | 0.395             |                  |
|                       | <b>Median (Q1 – Q3)</b>  | na                      | 50.0 (0.0 – 50.0)  | 25.0 (0.0 – 75.0)   | 0.0 (0.0 – 75.0)    | 12.5 (0.0 – 50.0)   |                   |                  |
| Stomach aches         | <b>Mean (SD)</b>         | na                      | 50.0 (25.0)        | 26.0 (32.0)         | 13.6 (22.8)         | 9.6 (18.8)          | <b>0.013</b>      |                  |
|                       | <b>Median (Q1 – Q3)</b>  | na                      | 50.0 (25.0 – 75.0) | 12.5 (0.0 – 100.0)  | 0.0 (0.0 – 75.0)    | 0.0 (0.0 – 50.0)    |                   |                  |
| Tiredness             | <b>Mean (SD)</b>         | na                      | 41.7 (14.4)        | 51.0 (26.9)         | 44.0 (27.5)         | 38.5 (29.4)         | 0.479             |                  |
|                       | <b>Median (Q1 – Q3)</b>  | na                      | 50.0 (25.0 – 50.0) | 50.0 (0.0 – 100.0)  | 50.0 (0.0 – 100.0)  | 37.5 (0.0 – 100.0)  |                   |                  |
| Trembling hands       | <b>Mean (SD)</b>         | na                      | 16.7 (28.9)        | 15.4 (22.4)         | 10.3 (22.7)         | 13.5 (24.7)         | 0.517             |                  |
|                       | <b>Median (Q1 – Q3)</b>  | na                      | 0.0 (0.0 – 50.0)   | 0.0 (0.0 – 75.0)    | 0.0 (0.0 – 75.0)    | 0.0 (0.0 – 100.0)   |                   |                  |
| Irritability          | <b>Mean (SD)</b>         | na                      | 66.7 (14.4)        | 35.2 (25.2)         | 34.2 (22.6)         | 26.9 (27.3)         | <b>0.050</b>      |                  |
|                       | <b>Median (Q1 – Q3)</b>  | na                      | 75.0 (50.0 – 75.0) | 50.0 (0.0 – 75.0)   | 50.0 (0.0 – 75.0)   | 25.0 (0.0 – 100.0)  |                   |                  |
| Aggressiveness        | <b>Mean (SD)</b>         | na                      | 41.7 (38.2)        | 14.4 (21.4)         | 9.2 (17.8)          | 13.5 (23.7)         | 0.243             |                  |
|                       | <b>Median (Q1 – Q3)</b>  | na                      | 50.0 (0.0 – 75.0)  | 0.0 (0.0 – 50.0)    | 0.0 (0.0 – 75.0)    | 0.0 (0.0 – 75.0)    |                   |                  |
| Moodiness             | <b>Mean (SD)</b>         | na                      | 33.3 (28.9)        | 27.9 (24.8)         | 23.4 (25.5)         | 16.3 (23.4)         | 0.297             |                  |
|                       | <b>Median (Q1 – Q3)</b>  | na                      | 50.0 (0.0 – 50.0)  | 25.0 (0.0 – 75.0)   | 25.0 (0.0 – 75.0)   | 0.0 (0.0 – 75.0)    |                   |                  |
| Sadness               | <b>Mean (SD)</b>         | na                      | 50.0 (25.0)        | 40.4 (30.9)         | 26.1 (26.3)         | 21.2 (26.2)         | <b>0.044</b>      |                  |
|                       | <b>Median (Q1 – Q3)</b>  | na                      | 50.0 (25.0 – 75.0) | 50.0 (0.0 – 100.0)  | 25.0 (0.0 – 100.0)  | 0.0 (0.0 – 75.0)    |                   |                  |
| Anxiety               | <b>Mean (SD)</b>         | na                      | 50.0 (43.3)        | 24.0 (28.7)         | 15.2 (23.9)         | 29.8 (34.7)         | 0.130             |                  |
|                       | <b>Median (Q1 – Q3)</b>  | na                      | 75.0 (0.0 – 75.0)  | 12.5 (0.0 – 75.0)   | 0.0 (0.0 – 75.0)    | 25.0 (0.0 – 100.0)  |                   |                  |
| Lack of concentration | <b>Mean (SD)</b>         | na                      | 33.3 (14.4)        | 31.7 (27.9)         | 23.4 (25.5)         | 17.3 (25.3)         | 0.160             |                  |
|                       | <b>Median (Q1 – Q3)</b>  | na                      | 25.0 (25.0 – 50.0) | 25.0 (0.0 – 100.0)  | 25.0 (0.0 – 100.0)  | 0.0 (0.0 – 75.0)    |                   |                  |
| Slow thinking         | <b>Mean (SD)</b>         | na                      | 25.0 (25.0)        | 28.8 (30.6)         | 15.2 (25.0)         | 11.5 (23.7)         | <b>0.038</b>      |                  |
|                       | <b>Median (Q1 – Q3)</b>  | na                      | 25.0 (0.0 – 50.0)  | 25.0 (0.0 – 100.0)  | 0.0 (0.0 – 100.0)   | 0.0 (0.0 – 75.0)    |                   |                  |

**Table 2\_c : Comparison of the Adult PKU-QOL scores according to overall assessment of health status (cont'd)**

| Modules                   | Domains                                            |                  | Poor<br>(N=0)      | Fair<br>(N=3)       | Good<br>(N=28)       | Very good<br>(N=46)  | Excellent<br>(N=26)  | p-value*         |
|---------------------------|----------------------------------------------------|------------------|--------------------|---------------------|----------------------|----------------------|----------------------|------------------|
| PKU in general            | Emotional impact of PKU                            | Mean (SD)        | na                 | 55.0 (10.0)         | 58.5 (16.7)          | 43.0 (22.0)          | 32.5 (20.6)          | <b>&lt;0.001</b> |
|                           |                                                    | Median (Q1 – Q3) | na                 | 55.0 (45.0 – 65.0)  | 60.0 (20.0 – 85.0)   | 45.0 (0.0 – 100.0)   | 30.0 (0.0 – 95.0)    |                  |
|                           | Practical impact of PKU                            | Mean (SD)        | na                 | 21.5 (14.8)         | 21.9 (17.8)          | 20.0 (17.6)          | 9.9 (13.0)           | <b>0.023</b>     |
|                           |                                                    | Median (Q1 – Q3) | na                 | 18.8 (8.3 – 37.5)   | 25.0 (0.0 – 58.3)    | 16.7 (0.0 – 75.0)    | 6.3 (0.0 – 43.8)     |                  |
|                           | Social impact of PKU                               | Mean (SD)        | na                 | 27.8 (30.1)         | 23.0 (19.2)          | 17.1 (13.5)          | 12.3 (10.7)          | 0.173            |
|                           |                                                    | Median (Q1 – Q3) | na                 | 12.5 (8.3 – 62.5)   | 18.8 (0.0 – 68.8)    | 14.6 (0.0 – 43.8)    | 10.4 (0.0 – 41.7)    |                  |
|                           | Overall impact of PKU                              | Mean (SD)        | na                 | 41.7 (14.7)         | 39.1 (14.2)          | 28.8 (15.5)          | 21.3 (12.5)          | <b>0.004</b>     |
|                           |                                                    | Median (Q1 – Q3) | na                 | 41.7 (31.3 – 52.1)  | 39.6 (12.5 – 68.8)   | 27.1 (2.1 – 62.5)    | 17.7 (6.3 – 52.1)    |                  |
|                           | Anxiety - Blood test                               | Mean (SD)        | na                 | 18.8 (8.8)          | 6.0 (13.5)           | 14.2 (27.8)          | 8.3 (17.2)           | 0.218            |
|                           |                                                    | Median (Q1 – Q3) | na                 | 18.8 (12.5 – 25.0)  | 0.0 (0.0 – 50.0)     | 0.0 (0.0 – 100.0)    | 0.0 (0.0 – 75.0)     |                  |
|                           | Anxiety - Phe levels                               | Mean (SD)        | na                 | 75.0 (25.0)         | 35.2 (28.8)          | 34.8 (25.0)          | 37.5 (28.5)          | 0.170            |
|                           |                                                    | Median (Q1 – Q3) | na                 | 75.0 (50.0 – 100.0) | 25.0 (0.0 – 100.0)   | 25.0 (0.0 – 100.0)   | 25.0 (0.0 – 75.0)    |                  |
|                           | Anxiety - Phe levels during pregnancy              | Mean (SD)        | na                 | 33.3 (38.2)         | 86.5 (16.5)          | 83.6 (22.5)          | 79.7 (24.5)          | 0.092            |
|                           |                                                    | Median (Q1 – Q3) | na                 | 25.0 (0.0 – 75.0)   | 100.0 (50.0 – 100.0) | 100.0 (25.0 – 100.0) | 100.0 (50.0 – 100.0) |                  |
|                           | Financial impact of PKU                            | Mean (SD)        | na                 | 41.7 (52.0)         | 30.6 (31.3)          | 14.1 (23.4)          | 13.5 (22.6)          | <b>0.035</b>     |
|                           |                                                    | Median (Q1 – Q3) | na                 | 25.0 (0.0 – 100.0)  | 25.0 (0.0 – 100.0)   | 0.0 (0.0 – 100.0)    | 0.0 (0.0 – 75.0)     |                  |
| Information on PKU        | Mean (SD)                                          | na               | 50.0 (50.0)        | 38.9 (23.3)         | 34.2 (25.5)          | 27.9 (19.1)          | 0.265                |                  |
|                           | Median (Q1 – Q3)                                   | na               | 50.0 (0.0 – 100.0) | 50.0 (0.0 – 100.0)  | 25.0 (0.0 – 100.0)   | 25.0 (0.0 – 75.0)    |                      |                  |
| Supplement administration | Adherence to supplements                           | Mean (SD)        | na                 | 16.7 (11.8)         | 20.2 (20.1)          | 19.3 (18.1)          | 21.8 (25.1)          | 0.991            |
|                           |                                                    | Median (Q1 – Q3) | na                 | 16.7 (8.3 – 25.0)   | 16.7 (0.0 – 66.7)    | 16.7 (0.0 – 66.7)    | 8.3 (0.0 – 66.47)    |                  |
|                           | Practical impact of supplements                    | Mean (SD)        | na                 | 60.4 (20.1)         | 28.5 (26.8)          | 18.8 (17.7)          | 15.9 (14.7)          | <b>0.033</b>     |
|                           |                                                    | Median (Q1 – Q3) | na                 | 68.8 (37.5 – 75.0)  | 18.8 (0.0 – 100.0)   | 18.8 (0.0 – 56.3)    | 12.5 (0.0 – 37.5)    |                  |
|                           | Guilt if poor adherence to supplements             | Mean (SD)        | na                 | 41.7 (52.0)         | 46.7 (34.0)          | 49.3 (35.1)          | 47.2 (27.0)          | 0.969            |
|                           |                                                    | Median (Q1 – Q3) | na                 | 25.0 (0.0 – 100.0)  | 50.0 (0.0 – 100.0)   | 50.0 (0.0 – 100.0)   | 50.0 (0.0 – 75.0)    |                  |
|                           | Relationships within family because of supplements | Mean (SD)        | na                 | 8.3 (14.4)          | 9.1 (26.2)           | 12.8 (22.5)          | 10.0 (18.8)          | 0.634            |
|                           |                                                    | Median (Q1 – Q3) | na                 | 0.0 (0.0 – 25.0)    | 0.0 (0.0 – 100.0)    | 0.0 (0.0 – 75.0)     | 0.0 (0.0 – 75.0)     |                  |
|                           | Taste - Supplements                                | Mean (SD)        | na                 | 58.3 (14.4)         | 45.2 (33.2)          | 48.6 (19.5)          | 55.3 (28.4)          | 0.543            |
|                           |                                                    | Median (Q1 – Q3) | na                 | 50.0 (50.0 – 75.0)  | 50.0 (0.0 – 100.0)   | 50.0 (25.0 – 100.0)  | 50.0 (0.0 – 100.0)   |                  |

**Table 2\_c : Comparison of the Adult PKU-QOL scores according to overall assessment of health status (cont'd)**

| Modules                                                  | Domains                                         |                         | Poor<br>(N=0)       | Fair<br>(N=3)      | Good<br>(N=28)     | Very good<br>(N=46) | Excellent<br>(N=26) | p-value*     |
|----------------------------------------------------------|-------------------------------------------------|-------------------------|---------------------|--------------------|--------------------|---------------------|---------------------|--------------|
| Dietary protein restriction                              | Food temptations                                | <b>Mean (SD)</b>        | na                  | 50.0 (12.5)        | 45.3 (29.2)        | 34.5 (22.4)         | 23.7 (19.0)         | <b>0.038</b> |
|                                                          |                                                 | <b>Median (Q1 – Q3)</b> | na                  | 50.0 (37.5 – 62.5) | 50.0 (0.0 – 100.0) | 43.8 (0.0 – 75.0)   | 25.0 (0.0 – 50.0)   |              |
|                                                          | Adherence to dietary protein restriction        | <b>Mean (SD)</b>        | na                  | 12.5 (17.7)        | 21.2 (17.4)        | 21.0 (18.4)         | 16.4 (19.7)         | 0.671        |
|                                                          |                                                 | <b>Median (Q1 – Q3)</b> | na                  | 12.5 (0.0 – 25.0)  | 18.8 (0.0 – 56.3)  | 22.5 (0.0 – 55.0)   | 10.0 (0.0 56.3)     |              |
|                                                          | Social impact of dietary protein restriction    | <b>Mean (SD)</b>        | na                  | 51.4 (31.8)        | 21.7 (19.8)        | 15.4 (15.1)         | 13.9 (16.7)         | 0.064        |
|                                                          |                                                 | <b>Median (Q1 – Q3)</b> | na                  | 58.3 (16.7 – 79.2) | 16.7 (0.0 – 75.0)  | 11.3 (0.0 – 54.2)   | 8.3 (0.0 – 54.2)    |              |
|                                                          | Practical impact of dietary protein restriction | <b>Mean (SD)</b>        | na                  | 64.3 (15.6)        | 38.5 (16.5)        | 31.7 (18.6)         | 33.7 (23.0)         | 0.079        |
|                                                          |                                                 | <b>Median (Q1 – Q3)</b> | na                  | 71.4 (46.4 – 75.0) | 39.6 (15.0 – 71.4) | 30.4 (0.0 – 64.3)   | 32.1 (7.1 – 67.9)   |              |
|                                                          | Overall impact of dietary protein restriction   | <b>Mean (SD)</b>        | na                  | 58.3 (22.5)        | 29.5 (14.9)        | 23.9 (15.0)         | 23.7 (18.8)         | 0.063        |
|                                                          |                                                 | <b>Median (Q1 – Q3)</b> | na                  | 67.3 (32.7 – 75.0) | 27.1 (9.1 – 58.3)  | 22.8 (0.0 – 53.8)   | 20.8 (2.5 – 59.6)   |              |
|                                                          | Taste – low protein food                        | <b>Mean (SD)</b>        | na                  | 58.3 (14.4)        | 36.8 (25.5)        | 30.5 (19.8)         | 30.4 (17.5)         | 0.125        |
|                                                          |                                                 | <b>Median (Q1 – Q3)</b> | na                  | 50.0 (50.0 – 75.0) | 25.0 (0.0 – 100.0) | 25.0 (0.0 – 75.0)   | 25.0 (0.0 – 50.0)   |              |
|                                                          | Food enjoyment                                  | <b>Mean (SD)</b>        | na                  | 58.3 (52.0)        | 29.3 (28.9)        | 25.7 (29.3)         | 18.4 (26.1)         | 0.335        |
|                                                          |                                                 | <b>Median (Q1 – Q3)</b> | na                  | 75.0 (0.0 – 100.0) | 25.0 (0.0 – 100.0) | 25.0 (0.0 – 100.0)  | 0.0 (0.0 – 100.0)   |              |
| Guilt if dietary protein restriction not followed        | <b>Mean (SD)</b>                                | na                      | 50.0 (43.3)         | 50.0 (29.9)        | 57.2 (35.3)        | 52.5 (26.8)         | 0.854               |              |
|                                                          | <b>Median (Q1 – Q3)</b>                         | na                      | 25.0 (25.0 – 100.0) | 50.0 (0.0 – 100.0) | 50.0 (0.0 – 100.0) | 50.0 (0.0 – 100.0)  |                     |              |
| Overall difficulty following dietary protein restriction | <b>Mean (SD)</b>                                | na                      | 41.7 (38.2)         | 34.8 (29.9)        | 23.1 (25.9)        | 28.9 (29.2)         | 0.383               |              |
|                                                          | <b>Median (Q1 – Q3)</b>                         | na                      | 50.0 (0.0 – 75.0)   | 25.0 (0.0 – 100.0) | 25.0 (0.0 – 100.0) | 25.0 (0.0 – 75.0)   |                     |              |

\*Non-parametric P-value for between-group comparisons: Kruskal-Wallis  
 In bold p-value<0.05

**Table 2\_d : Comparison of the Parent PKU-QOL scores according to patient's overall assessment of health status**

| Modules               | Domains             | Poor (N=0)       | Fair (N=2)         | Good (N=64)        | Very good (N=101)  | Excellent (N=84)   | p-value*           |                  |
|-----------------------|---------------------|------------------|--------------------|--------------------|--------------------|--------------------|--------------------|------------------|
| Symptoms              | Child health status | Mean (SD)        | na                 | 12.5 (17.7)        | 38.5 (19.7)        | 34.3 (25.4)        | 23.2 (22.9)        | <b>&lt;0.001</b> |
|                       |                     | Median (Q1 – Q3) |                    | 12.5 (0.0 – 25.0)  | 50.0 (0.0 – 75.0)  | 25.0 (0.0 – 100.0) | 25.0 (0.0 – 100.0) |                  |
|                       | Headaches           | Mean (SD)        | na                 | 25.0 (35.4)        | 20.1 (23.2)        | 15.4 (20.7)        | 9.2 (17.7)         | <b>0.012</b>     |
|                       |                     | Median (Q1 – Q3) |                    | 25.0 (0.0 – 50.0)  | 25.0 (0.0 – 75.0)  | 0.0 (0.0 – 75.0)   | 0.0 (0.0 – 75.0)   |                  |
|                       | Stomach aches       | Mean (SD)        | na                 | 37.5 (53.0)        | 17.6 (22.5)        | 21.0 (24.1)        | 16.7 (25.2)        | 0.391            |
|                       |                     | Median (Q1 – Q3) |                    | 37.5 (0.0 – 75.0)  | 0.0 (0.0 – 75.0)   | 25.0 (0.0 – 75.0)  | 0.0 (0.0 – 100.0)  |                  |
|                       | Tiredness           | Mean (SD)        | na                 | 12.5 (17.7)        | 35.7 (25.2)        | 31.3 (23.8)        | 30.1 (26.3)        | 0.313            |
|                       |                     | Median (Q1 – Q3) |                    | 12.5 (0.0 – 25.0)  | 50.0 (0.0 – 100.0) | 25.0 (0.0 – 100.0) | 25.0 (0.0 – 100.0) |                  |
|                       | Irritability        | Mean (SD)        | na                 | 62.5 (17.7)        | 43.9 (27.3)        | 34.8 (26.7)        | 31.3 (27.7)        | <b>0.015</b>     |
|                       |                     | Median (Q1 – Q3) |                    | 62.5 (50.0 – 75.0) | 50.0 (0.0 – 100.0) | 25.0 (0.0 – 100.0) | 25.0 (0.0 – 100.0) |                  |
|                       | Aggressiveness      | Mean (SD)        | na                 | 37.5 (17.7)        | 16.9 (24.3)        | 11.5 (21.0)        | 11.6 (20.9)        | 0.085            |
|                       |                     | Median (Q1 – Q3) |                    | 37.5 (25.0 – 50.0) | 0.0 (0.0 – 100.0)  | 0.0 (0.0 – 75.0)   | 0.0 (0.0 – 100.0)  |                  |
|                       | Moodiness           | Mean (SD)        | na                 | 12.5 (17.7)        | 32.0 (24.2)        | 25.8 (26.2)        | 27.7 (26.2)        | 0.291            |
|                       |                     | Median (Q1 – Q3) |                    | 12.5 (0.0 – 25.0)  | 25.0 (0.0 – 100.0) | 25.0 (0.0 – 100.0) | 25.0 (0.0 – 100.0) |                  |
| Sadness               | Mean (SD)           | na               | 25.0 (0.0)         | 25.4 (21.6)        | 18.9 (22.6)        | 12.2 (17.7)        | <b>0.001</b>       |                  |
|                       | Median (Q1 – Q3)    |                  | 25.0 (25.0 – 25.0) | 25.0 (0.0 – 100.0) | 25.0 (0.0 – 100.0) | 0.0 (0.0 – 75.0)   |                    |                  |
| Anxiety               | Mean (SD)           | na               | 0.0 (0.0)          | 20.8 (26.7)        | 13.4 (20.7)        | 10.8 (18.4)        | 0.066              |                  |
|                       | Median (Q1 – Q3)    |                  | 0.0 (0.0 – 0.0)    | 0.0 (0.0 – 100.0)  | 0.0 (0.0 – 100.0)  | 0.0 (0.0 – 75.0)   |                    |                  |
| Lack of concentration | Mean (SD)           | na               | 12.5 (17.7)        | 36.7 (30.7)        | 28.4 (27.2)        | 28.4 (27.1)        | 0.278              |                  |
|                       | Median (Q1 – Q3)    |                  | 12.5 (0.0 – 25.0)  | 25.0 (0.0 – 100.0) | 25.0 (0.0 – 100.0) | 25.0 (0.0 – 100.0) |                    |                  |
| Slow thinking         | Mean (SD)           | na               | 12.5 (17.7)        | 27.6 (28.4)        | 18.0 (26.3)        | 16.3 (23.9)        | 0.053              |                  |
|                       | Median (Q1 – Q3)    |                  | 12.5 (0.0 – 25.0)  | 25.0 (0.0 – 100.0) | 0.0 (0.0 – 100.0)  | 0.0 (0.0 – 75.0)   |                    |                  |

**Table 2\_d : Comparison of the Parent PKU-QOL scores according to patient's overall assessment of health status (cont'd)**

| Modules                                            | Domains                              |                  | Poor<br>(N=0)       | Fair<br>(N=2)      | Good<br>(N=64)     | Very good<br>(N=101) | Excellent<br>(N=84) | p-value*         |
|----------------------------------------------------|--------------------------------------|------------------|---------------------|--------------------|--------------------|----------------------|---------------------|------------------|
| PKU in general                                     | Emotional impact of PKU              | Mean (SD)        | na                  | 28.1 (13.3)        | 52.4 (22.4)        | 41.6 (21.8)          | 37.3 (22.9)         | <b>&lt;0.001</b> |
|                                                    |                                      | Median (Q1 – Q3) |                     | 28.1 (18.8 – 37.5) | 56.3 (6.3 – 87.5)  | 37.5 (6.3 – 100.0)   | 34.4 (0.0 – 100.0)  |                  |
|                                                    | Practical impact of PKU              | Mean (SD)        | na                  | 25.4 (28.9)        | 18.9 (15.8)        | 14.9 (13.8)          | 10.4 (13.0)         | <b>0.007</b>     |
|                                                    |                                      | Median (Q1 – Q3) |                     | 25.4 (5.0 – 45.8)  | 16.7 (0.0 – 70.0)  | 12.5 (0.0 – 50.0)    | 5.0 (0.0 – 54.2)    |                  |
|                                                    | Social impact of PKU                 | Mean (SD)        | na                  | 25.0 (21.2)        | 21.7 (17.5)        | 16.6 (17.0)          | 14.4 (15.3)         | <b>0.019</b>     |
|                                                    |                                      | Median (Q1 – Q3) |                     | 25.0 (10.0 – 40.0) | 15.0 (0.0 – 90.0)  | 10.0 (0.0 – 80.0)    | 10.0 (0.0 – 70.0)   |                  |
|                                                    | Overall impact of PKU                | Mean (SD)        | na                  | 26.2 (21.9)        | 30.6 (15.9)        | 23.5 (14.9)          | 19.6 (14.2)         | <b>&lt;0.001</b> |
|                                                    |                                      | Median (Q1 – Q3) |                     | 26.2 (10.7 – 41.7) | 28.3 (6.7 – 76.9)  | 21.2 (1.7 – 67.3)    | 15.8 (0.0 – 73.1)   |                  |
|                                                    | Child anxiety - Blood test           | Mean (SD)        | na                  | 25.0 (0.0)         | 26.0 (27.9)        | 22.3 (28.5)          | 23.8 (27.5)         | 0.670            |
|                                                    |                                      | Median (Q1 – Q3) |                     | 25.0 (25.0 – 25.0) | 12.5 (0.0 – 100.0) | 12.5 (0.0 – 100.0)   | 12.5 (0.0 – 100.0)  |                  |
|                                                    | Impact of child anxiety - Blood test | Mean (SD)        | na                  | 25.0 (17.7)        | 28.4 (31.2)        | 23.3 (27.2)          | 23.8 (28.7)         | 0.784            |
|                                                    |                                      | Median (Q1 – Q3) |                     | 25.0 (12.5 – 37.5) | 25.0 (0.0 – 100.0) | 12.5 (0.0 – 100.0)   | 12.5 (0.0 – 100.0)  |                  |
| Anxiety - Phe levels                               | Mean (SD)                            | na               | 50.0 (35.4)         | 61.9 (28.7)        | 54.6 (30.7)        | 50.6 (34.9)          | 0.206               |                  |
|                                                    | Median (Q1 – Q3)                     |                  | 50.0 (25.0 – 75.0)  | 75.0 (0.0 – 100.0) | 50.0 (0.0 – 100.0) | 50.0 (0.0 – 100.0)   |                     |                  |
| Financial impact of PKU                            | Mean (SD)                            | na               | 75.0 (35.4)         | 30.0 (30.5)        | 30.2 (30.0)        | 18.2 (24.3)          | <b>0.004</b>        |                  |
|                                                    | Median (Q1 – Q3)                     |                  | 75.0 (50.0 – 100.0) | 25.0 (0.0 – 100.0) | 25.0 (0.0 – 100.0) | 0.0 (0.0 – 100.0)    |                     |                  |
| Information on PKU                                 | Mean (SD)                            | na               | 37.5 (53.0)         | 38.1 (25.7)        | 31.1 (23.3)        | 26.5 (23.4)          | <b>0.032</b>        |                  |
|                                                    | Median (Q1 – Q3)                     |                  | 37.5 (0.0 – 75.0)   | 25.0 (0.0 – 100.0) | 25.0 (0.0 – 100.0) | 25.0 (0.0 – 100.0)   |                     |                  |
| Supplement administration                          | Adherence to supplements             | Mean (SD)        | na                  | 0.0 (0.0)          | 16.8 (24.1)        | 9.9 (14.9)           | 10.0 (16.2)         | 0.224            |
|                                                    |                                      | Median (Q1 – Q3) |                     | 0.0 (0.0 – 0.0)    | 0.0 (0.0 – 100.0)  | 0.0 (0.0 – 50.0)     | 0.0 (0.0 – 75.0)    |                  |
|                                                    | Management of supplements            | Mean (SD)        | na                  | 37.5 (17.7)        | 15.5 (27.8)        | 20.8 (29.5)          | 14.8 (24.5)         | 0.180            |
|                                                    |                                      | Median (Q1 – Q3) |                     | 37.5 (25.0 – 50.0) | 0.0 (0.0 – 100.0)  | 0.0 (0.0 – 100.0)    | 0.0 (0.0 – 100.0)   |                  |
|                                                    | Practical impact of supplements      | Mean (SD)        | na                  | 25.0 (11.8)        | 21.5 (26.3)        | 22.0 (22.3)          | 18.1 (23.2)         | 0.353            |
| Median (Q1 – Q3)                                   |                                      |                  | 25.0 (16.7 – 33.3)  | 8.3 (0.0 – 100.0)  | 16.7 (0.0 – 100.0) | 8.3 (0.0 – 83.3)     |                     |                  |
| Guilt if poor adherence to supplements             | Mean (SD)                            | na               | 62.5 (53.0)         | 55.8 (36.3)        | 53.4 (33.8)        | 49.3 (32.9)          | 0.697               |                  |
|                                                    | Median (Q1 – Q3)                     |                  | 62.5 (25.0 – 100.0) | 50.0 (0.0 – 100.0) | 50.0 (0.0 – 100.0) | 50.0 (0.0 – 100.0)   |                     |                  |
| Relationships within family because of supplements | Mean (SD)                            | na               | 12.5 (17.7)         | 19.2 (27.4)        | 23.3 (28.4)        | 14.3 (21.7)          | 0.246               |                  |
|                                                    | Median (Q1 – Q3)                     |                  | 12.5 (0.0 – 25.0)   | 0.0 (0.0 – 100.0)  | 25.0 (0.0 – 100.0) | 0.0 (0.0 – 75.0)     |                     |                  |

**Table 2\_d : Comparison of the Parent PKU-QOL scores according to patient's overall assessment of health status (cont'd)**

| Modules                     | Domains                                           |                         | Poor<br>(N=0) | Fair<br>(N=2)      | Good<br>(N=64)     | Very good<br>(N=101) | Excellent<br>(N=84) | p-value*     |
|-----------------------------|---------------------------------------------------|-------------------------|---------------|--------------------|--------------------|----------------------|---------------------|--------------|
| Dietary protein restriction | Adherence to dietary protein restriction          | <b>Mean (SD)</b>        | na            | 12.5 (17.7)        | 20.5 (26.8)        | 15.9 (28.5)          | 5.7 (16.0)          | <b>0.001</b> |
|                             |                                                   | <b>Median (Q1 – Q3)</b> | na            | 12.5 (0.0 – 25.0)  | 0.0 (0.0 – 100.0)  | 0.0 (0.0 – 100.0)    | 0.0 (0.0 – 100.0)   |              |
|                             | Management of dietary protein restriction         | <b>Mean (SD)</b>        | na            | 37.5 (17.7)        | 31.8 (25.3)        | 23.4 (22.4)          | 20.6 (17.4)         | <b>0.048</b> |
|                             |                                                   | <b>Median (Q1 – Q3)</b> | na            | 37.5 (25.0 – 50.0) | 25.0 (0.0 – 100.0) | 16.7 (0.0 – 95.8)    | 16.7 (0.0 – 70.8)   |              |
|                             | Practical impact of dietary protein restriction   | <b>Mean (SD)</b>        | na            | 34.5 (1.7)         | 33.2 (20.9)        | 32.4 (20.0)          | 30.7 (22.5)         | 0.860        |
|                             |                                                   | <b>Median (Q1 – Q3)</b> | na            | 34.5 (33.3 – 35.7) | 32.1 (0.0 – 82.1)  | 30.4 (0.0 – 78.6)    | 28.6 (0.0 – 82.1)   |              |
|                             | Child food enjoyment                              | <b>Mean (SD)</b>        | na            | 12.5 (17.7)        | 20.5 (20.8)        | 21.4 (28.3)          | 18.7 (21.5)         | 0.900        |
|                             |                                                   | <b>Median (Q1 – Q3)</b> | na            | 12.5 (0.0 – 25.0)  | 25.0 (0.0 – 75.0)  | 0.0 (0.0 – 100.0)    | 25.0 (0.0 – 75.0)   |              |
|                             | Guilt if dietary protein restriction not followed | <b>Mean (SD)</b>        | na            | 50.0 (35.4)        | 47.6 (36.1)        | 46.7 (34.8)          | 41.5 (35.6)         | 0.716        |
|                             |                                                   | <b>Median (Q1 – Q3)</b> | na            | 50.0 (25.0 – 75.0) | 50.0 (0.0 – 100.0) | 50.0 (0.0 – 100.0)   | 25.0 (0.0 – 100.0)  |              |

\*Non-parametric P-value for between-group comparisons: Kruskal-Wallis  
 In bold p-value<0.05
