# Supplementary material for: Assessment of the impact of phenylketonuria and its treatment on quality of life of patients and parents from seven European countries
Source: Springer Nature journal article supplement (doi:10.1186/s13023-015-0294-x), 2015-06-17
Supplement: MOESM3 [file 9776166]

Additional File 3 : Comparison of PKU-QOL scores according to BH4 intake

Table 3\_a : Comparison of the Child PKU-QOL scores according to BH4 intake

| Modules                                            | Domains                          |                          | BH4<br>(N=27)      | No BH4<br>(N=65)   | p-value*          |       |
|----------------------------------------------------|----------------------------------|--------------------------|--------------------|--------------------|-------------------|-------|
| <b>Symptoms</b>                                    | Headaches                        | Mean (SD)                | 15.7 (25.1)        | 15.2 (20.0)        | 0.778             |       |
|                                                    |                                  | Median (Q1 – Q3)         | 0.0 (0.0 – 100.0)  | 0.0 (0.0 – 75.0)   |                   |       |
|                                                    | Stomach aches                    | Mean (SD)                | 18.5 (23.6)        | 14.8 (22.1)        | 0.483             |       |
|                                                    |                                  | Median (Q1 – Q3)         | 0.0 (0.0 – 75.0)   | 0.0 (0.0 – 100.0)  |                   |       |
|                                                    | Tiredness                        | Mean (SD)                | 34.3 (29.5)        | 35.2 (25.2)        | 0.891             |       |
|                                                    |                                  | Median (Q1 – Q3)         | 50.0 (0.0 – 100.0) | 25.0 (0.0 – 100.0) |                   |       |
|                                                    | Irritability                     | Mean (SD)                | 22.2 (33.5)        | 17.2 (26.0)        | 0.800             |       |
|                                                    |                                  | Median (Q1 – Q3)         | 0.0 (0.0 – 100.0)  | 0.0 (0.0 – 100.0)  |                   |       |
|                                                    | Aggressiveness                   | Mean (SD)                | 13.0 (26.3)        | 11.9 (22.6)        | 0.936             |       |
|                                                    |                                  | Median (Q1 – Q3)         | 0.0 (0.0 – 100.0)  | 0.0 (0.0 – 100.0)  |                   |       |
|                                                    | Moodiness                        | Mean (SD)                | 23.1 (25.9)        | 13.5 (22.2)        | 0.091             |       |
|                                                    |                                  | Median (Q1 – Q3)         | 0.0 (0.0 – 75.0)   | 0.0 (0.0 – 100.0)  |                   |       |
|                                                    | Sadness                          | Mean (SD)                | 17.6 (22.8)        | 15.7 (23.6)        | 0.655             |       |
|                                                    |                                  | Median (Q1 – Q3)         | 0.0 (0.0 – 75.0)   | 0.0 (0.0 – 100.0)  |                   |       |
|                                                    | Anxiety                          | Mean (SD)                | 8.7 (18.6)         | 9.3 (18.2)         | 0.717             |       |
|                                                    |                                  | Median (Q1 – Q3)         | 0.0 (0.0 – 50.0)   | 0.0 (0.0 – 75.0)   |                   |       |
|                                                    | Lack of concentration            | Mean (SD)                | 17.7 (27.1)        | 23.7 (28.8)        | 0.350             |       |
|                                                    |                                  | Median (Q1 – Q3)         | 0.0 (0.0 – 100.0)  | 25.0 (0.0 – 100.0) |                   |       |
|                                                    | Slow thinking                    | Mean (SD)                | 24.0 (27.1)        | 22.3 (25.8)        | 0.802             |       |
|                                                    |                                  | Median (Q1 – Q3)         | 25.0 (0.0 – 100.0) | 25.0 (0.0 – 100.0) |                   |       |
| <b>PKU in general</b>                              | Emotional impact of PKU          | Mean (SD)                | 32.1 (21.2)        | 33.3 (22.4)        | 0.850             |       |
|                                                    |                                  | Median (Q1 – Q3)         | 33.3 (0.0 – 66.7)  | 33.3 (0.0 – 83.3)  |                   |       |
|                                                    | Practical impact of PKU          | Mean (SD)                | 12.0 (19.5)        | 10.5 (15.7)        | 0.908             |       |
|                                                    |                                  | Median (Q1 – Q3)         | 0.0 (0.0 – 75.0)   | 0.0 (0.0 – 75.0)   |                   |       |
|                                                    | Social impact of PKU             | Mean (SD)                | 18.9 (21.9)        | 19.6 (16.4)        | 0.468             |       |
|                                                    |                                  | Median (Q1 – Q3)         | 16.7 (0.0 – 91.7)  | 16.7 (0.0 – 75.0)  |                   |       |
|                                                    | Overall impact of PKU            | Mean (SD)                | 22.1 (16.7)        | 22.5 (14.8)        | 0.640             |       |
|                                                    |                                  | Median (Q1 – Q3)         | 17.2 (0.0 – 71.9)  | 18.8 (0.0 – 78.1)  |                   |       |
|                                                    | Anxiety - Blood test             | Mean (SD)                | 13.4 (17.3)        | 11.9 (16.7)        | 0.531             |       |
|                                                    |                                  | Median (Q1 – Q3)         | 12.5 (0.0 – 62.5)  | 0.0 (0.0 – 50.0)   |                   |       |
|                                                    | Anxiety - Phe levels             | Mean (SD)                | 53.7 (43.1)        | 41.1 (33.3)        | 0.219             |       |
|                                                    |                                  | Median (Q1 – Q3)         | 50.0 (0.0 – 100.0) | 25.0 (0.0 – 100.0) |                   |       |
|                                                    | <b>Supplement administration</b> | Adherence to supplements | Mean (SD)          | 12.5 (15.9)        | 10.5 (17.7)       | 0.366 |
|                                                    |                                  |                          | Median (Q1 – Q3)   | 12.5 (0.0 – 50.0)  | 0.0 (0.0 – 100.0) |       |
| Practical impact of supplements                    |                                  | Mean (SD)                | 15.2 (29.9)        | 19.4 (32.1)        | 0.581             |       |
|                                                    |                                  | Median (Q1 – Q3)         | 0.0 (0.0 – 100.0)  | 0.0 (0.0 – 100.0)  |                   |       |
| Guilt if poor adherence to supplements             |                                  | Mean (SD)                | 31.0 (37.0)        | 50.4 (38.3)        | <b>0.040</b>      |       |
|                                                    |                                  | Median (Q1 – Q3)         | 25.0 (0.0 – 100.0) | 50.0 (0.0 – 100.0) |                   |       |
| Relationships within family because of supplements |                                  | Mean (SD)                | 12.0 (26.0)        | 8.5 (19.7)         | 0.808             |       |
|                                                    |                                  | Median (Q1 – Q3)         | 0.0 (0.0 – 100.0)  | 0.0 (0.0 – 100.0)  |                   |       |
| Taste - Supplements                                |                                  | Mean (SD)                | 42.0 (27.2)        | 33.6 (33.5)        | 0.186             |       |
|                                                    |                                  | Median (Q1 – Q3)         | 50.0 (0.0 – 100.0) | 25.0 (0.0 – 100.0) |                   |       |

**Table 3\_a : Comparison of the Child PKU-QOL scores according to BH4 intake (cont'd)**

| Modules                            | Domains                                                  |                         | BH4<br>(N=27)      | No BH4<br>(N=65)   | p-value* |
|------------------------------------|----------------------------------------------------------|-------------------------|--------------------|--------------------|----------|
| <b>Dietary protein restriction</b> | Food temptations                                         | <b>Mean (SD)</b>        | 37.5 (30.4)        | 26.4 (26.4)        | 0.115    |
|                                    |                                                          | <b>Median (Q1 – Q3)</b> | 50.0 (0.0 – 87.5)  | 25.0 (0.0 – 100.0) |          |
| <b>Dietary protein restriction</b> | Adherence to dietary protein restriction                 | <b>Mean (SD)</b>        | 9.9 (18.1)         | 11.1 (16.3)        | 0.510    |
|                                    |                                                          | <b>Median (Q1 – Q3)</b> | 0.0 (0.0 – 62.5)   | 0.0 (0.0 – 62.5)   |          |
|                                    | Social impact of dietary protein restriction             | <b>Mean (SD)</b>        | 21.5 (23.3)        | 17.4 (16.6)        | 0.819    |
|                                    |                                                          | <b>Median (Q1 – Q3)</b> | 12.5 (0.0 – 80.0)  | 15.0 (0.0 – 70.0)  |          |
|                                    | Taste – low protein food                                 | <b>Mean (SD)</b>        | 16.2 (19.6)        | 18.5 (24.4)        | 0.875    |
|                                    |                                                          | <b>Median (Q1 – Q3)</b> | 0.0 (0.0 – 50.0)   | 25.0 (0.0 – 100.0) |          |
|                                    | Food enjoyment                                           | <b>Mean (SD)</b>        | 15.7 (21.0)        | 17.7 (24.5)        | 0.808    |
|                                    |                                                          | <b>Median (Q1 – Q3)</b> | 0.0 (0.0 – 50.0)   | 0.0 (0.0 – 100.0)  |          |
|                                    | Guilt if dietary protein restriction not followed        | <b>Mean (SD)</b>        | 44.6 (44.6)        | 55.0 (39.8)        | 0.281    |
|                                    |                                                          | <b>Median (Q1 – Q3)</b> | 50.0 (0.0 – 100.0) | 50.0 (0.0 – 100.0) |          |
|                                    | Overall difficulty following dietary protein restriction | <b>Mean (SD)</b>        | 24.0 (36.5)        | 16.5 (23.5)        | 0.858    |
|                                    |                                                          | <b>Median (Q1 – Q3)</b> | 0.0 (0.0 – 100.0)  | 0.0 (0.0 – 100.0)  |          |

\*Non-parametric P-value for between-group comparisons: Mann-Whitney-Wilcoxon  
 In bold p-value<0.05

**Table 3\_b : Comparison of the Adolescent PKU-QOL scores according to BH4 intake**

| Modules               | Domains                  |                         | BH4<br>(N=27)      | No BH4<br>(N=83)   | p-value*     |
|-----------------------|--------------------------|-------------------------|--------------------|--------------------|--------------|
| <b>Symptoms</b>       | Self-rated status health | <b>Mean (SD)</b>        | 33.3 (25.9)        | 35.3 (24.0)        | 0.680        |
|                       |                          | <b>Median (Q1 – Q3)</b> | 25.0 (0.0 – 75.0)  | 50.0 (0.0 – 75.0)  |              |
|                       | Headaches                | <b>Mean (SD)</b>        | 18.5 (23.6)        | 20.5 (26.0)        | 0.795        |
|                       |                          | <b>Median (Q1 – Q3)</b> | 0.0 (0.0 – 75.0)   | 0.0 (0.0 – 100.0)  |              |
|                       | Stomach aches            | <b>Mean (SD)</b>        | 14.8 (24.3)        | 14.4 (20.0)        | 0.802        |
|                       |                          | <b>Median (Q1 – Q3)</b> | 0.0 (0.0 – 100.0)  | 0.0 (0.0 – 75.0)   |              |
|                       | Tiredness                | <b>Mean (SD)</b>        | 40.7 (28.7)        | 40.4 (25.2)        | 0.911        |
|                       |                          | <b>Median (Q1 – Q3)</b> | 50.0 (0.0 – 100.0) | 50.0 (0.0 – 100.0) |              |
|                       | Irritability             | <b>Mean (SD)</b>        | 24.1 (26.4)        | 25.0 (25.8)        | 0.849        |
|                       |                          | <b>Median (Q1 – Q3)</b> | 25.0 (0.0 – 75.0)  | 25.0 (0.0 – 100.0) |              |
|                       | Aggressiveness           | <b>Mean (SD)</b>        | 12.0 (22.3)        | 11.9 (22.8)        | 0.985        |
|                       |                          | <b>Median (Q1 – Q3)</b> | 0.0 (0.0 – 75.0)   | 0.0 (0.0 – 100.0)  |              |
|                       | Moodiness                | <b>Mean (SD)</b>        | 16.7 (19.6)        | 20.9 (23.7)        | 0.515        |
|                       |                          | <b>Median (Q1 – Q3)</b> | 0.0 (0.0 – 50.0)   | 25.0 (0.0 – 75.0)  |              |
|                       | Sadness                  | <b>Mean (SD)</b>        | 4.6 (12.1)         | 14.7 (20.9)        | <b>0.022</b> |
|                       |                          | <b>Median (Q1 – Q3)</b> | 0.0 (0.0 – 50.0)   | 0.0 (0.0 – 75.0)   |              |
|                       | Anxiety                  | <b>Mean (SD)</b>        | 13.0 (24.4)        | 14.4 (23.5)        | 0.694        |
|                       |                          | <b>Median (Q1 – Q3)</b> | 0.0 (0.0 – 100.0)  | 0.0 (0.0 – 100.0)  |              |
|                       | Lack of concentration    | <b>Mean (SD)</b>        | 17.6 (26.7)        | 20.3 (23.6)        | 0.424        |
|                       |                          | <b>Median (Q1 – Q3)</b> | 0.0 (0.0 – 100.0)  | 12.5 (0.0 – 75.0)  |              |
|                       | Slow thinking            | <b>Mean (SD)</b>        | 13.0 (18.8)        | 14.1 (20.2)        | 0.869        |
|                       |                          | <b>Median (Q1 – Q3)</b> | 0.0 (0.0 – 50.0)   | 0.0 (0.0 – 75.0)   |              |
| <b>PKU in general</b> | Emotional impact of PKU  | <b>Mean (SD)</b>        | 27.1 (15.3)        | 33.8 (20.9)        | 0.209        |
|                       |                          | <b>Median (Q1 – Q3)</b> | 30.0 (0.0 – 70.0)  | 30.0 (0.0 – 90.0)  |              |
|                       | Practical impact of PKU  | <b>Mean (SD)</b>        | 10.0 (12.9)        | 12.5 (14.2)        | 0.707        |
|                       |                          | <b>Median (Q1 – Q3)</b> | 8.3 (0.0 – 33.3)   | 8.3 (0.0 – 50.0)   |              |
|                       | Social impact of PKU     | <b>Mean (SD)</b>        | 11.2 (11.8)        | 17.1 (15.0)        | 0.052        |
|                       |                          | <b>Median (Q1 – Q3)</b> | 8.3 (0.0 – 41.7)   | 16.7 (0.0 – 91.7)  |              |
|                       | Overall impact of PKU    | <b>Mean (SD)</b>        | 17.8 (10.7)        | 24.4 (16.1)        | 0.066        |
|                       |                          | <b>Median (Q1 – Q3)</b> | 17.5 (2.3 – 50.0)  | 22.7 (0.0 – 85.0)  |              |
|                       | Anxiety - Blood test     | <b>Mean (SD)</b>        | 11.1 (21.9)        | 10.8 (20.4)        | 0.857        |
|                       |                          | <b>Median (Q1 – Q3)</b> | 0.0 (0.0 - 87.5)   | 0.0 (0.0 – 100.0)  |              |
|                       | Anxiety - Phe levels     | <b>Mean (SD)</b>        | 35.6 (33.3)        | 35.6 (31.3)        | 0.943        |
|                       |                          | <b>Median (Q1 – Q3)</b> | 25.0 (0.0 – 100.0) | 25.0 (0.0 – 100.0) |              |

**Table 3\_b : Comparison of the Adolescent PKU-QOL scores according to BH4 intake (cont'd)**

| Modules                            | Domains                                                  |                  | BH4<br>(N=27)      | No BH4<br>(N=83)   | p-value*     |
|------------------------------------|----------------------------------------------------------|------------------|--------------------|--------------------|--------------|
| <b>Supplement administration</b>   | Adherence to supplements                                 | Mean (SD)        | 7.6 (9.9)          | 16.7 (20.5)        | 0.103        |
|                                    |                                                          | Median (Q1 – Q3) | 3.1 (0.0 – 33.3)   | 7.3 (0.0 – 83.3)   |              |
|                                    | Practical impact of supplements                          | Mean (SD)        | 6.6 (8.7)          | 22.6 (25.2)        | <b>0.006</b> |
|                                    |                                                          | Median (Q1 – Q3) | 3.1 (0.0 – 25.0)   | 12.5 (0.0 – 100.0) |              |
|                                    | Guilt if poor adherence to supplements                   | Mean (SD)        | 42.5 (33.5)        | 43.6 (36.6)        | 0.985        |
|                                    |                                                          | Median (Q1 – Q3) | 37.5 (0.0 – 100.0) | 25.0 (0.0 – 100.0) |              |
|                                    | Relationships within family because of supplements       | Mean (SD)        | 10.0 (17.0)        | 15.5 (27.0)        | 0.727        |
|                                    |                                                          | Median (Q1 – Q3) | 0.0 (0.0 – 50.0)   | 0.0 (0.0 – 100.0)  |              |
|                                    | Taste - Supplements                                      | Mean (SD)        | 41.3 (20.3)        | 40.9 (26.0)        | 0.644        |
|                                    |                                                          | Median (Q1 – Q3) | 50.0 (0.0 – 75.0)  | 50.0 (0.0 – 100.0) |              |
| <b>Dietary protein restriction</b> | Food temptations                                         | Mean (SD)        | 14.6 (18.8)        | 29.3 (29.3)        | <b>0.049</b> |
|                                    |                                                          | Median (Q1 – Q3) | 0.0 (0.0 – 50.0)   | 25.0 (0.0 – 100.0) |              |
|                                    | Adherence to dietary protein restriction                 | Mean (SD)        | 7.2 (10.6)         | 15.0 (19.8)        | 0.124        |
|                                    |                                                          | Median (Q1 – Q3) | 0.0 (0.0 – 33.3)   | 8.3 (0.0 – 83.3)   |              |
|                                    | Practical impact of dietary protein restriction          | Mean (SD)        | 22.8 (13.7)        | 28.1 (19.0)        | 0.574        |
|                                    |                                                          | Median (Q1 – Q3) | 20.7 (0.0 – 53.6)  | 28.6 (0.0 – 85.7)  |              |
|                                    | Social impact of dietary protein restriction             | Mean (SD)        | 5.3 (10.9)         | 16.0 (21.8)        | <b>0.031</b> |
|                                    |                                                          | Median (Q1 – Q3) | 0.0 (0.0 – 45.0)   | 7.5 (0.0 – 90.0)   |              |
|                                    | Overall impact of dietary protein restriction            | Mean (SD)        | 14.7 (11.2)        | 21.8 (18.0)        | 0.155        |
|                                    |                                                          | Median (Q1 – Q3) | 13.6 (0.0 – 37.5)  | 18.2 (0.0 – 86.4)  |              |
|                                    | Taste – low protein food                                 | Mean (SD)        | 22.9 (16.7)        | 26.4 (26.8)        | 0.978        |
|                                    |                                                          | Median (Q1 – Q3) | 25.0 (0.0 – 50.0)  | 25.0 (0.0 – 100.0) |              |
|                                    | Food enjoyment                                           | Mean (SD)        | 11.8 (21.9)        | 17.1 (27.6)        | 0.482        |
|                                    |                                                          | Median (Q1 – Q3) | 0.0 (0.0 – 75.0)   | 0.0 (0.0 – 100.0)  |              |
|                                    | Guilt if dietary protein restriction not followed        | Mean (SD)        | 34.7 (36.5)        | 49.3 (34.9)        | 0.112        |
|                                    |                                                          | Median (Q1 – Q3) | 25.0 (0.0 – 100.0) | 50.0 (0.0 – 100.0) |              |
|                                    | Overall difficulty following dietary protein restriction | Mean (SD)        | 3.9 (9.4)          | 20.3 (28.4)        | <b>0.010</b> |
|                                    |                                                          | Median (Q1 – Q3) | 0.0 (0.0 – 25.0)   | 0.0 (0.0 – 100.0)  |              |

\*Non-parametric P-value for between-group comparisons: Mann-Whitney-Wilcoxon  
In bold p-value<0.05

**Table 3\_c : Comparison of the Adult PKU-QOL scores according to BH4 intake**

| Modules               | Domains                               |                         | BH4<br>(N=15)        | No BH4<br>(N=89)    | p-value*     |
|-----------------------|---------------------------------------|-------------------------|----------------------|---------------------|--------------|
| <b>Symptoms</b>       | Self-rated health status              | <b>Mean (SD)</b>        | 28.6 (25.7)          | 34.3 (22.4)         | 0.430        |
|                       |                                       | <b>Median (Q1 – Q3)</b> | 25.0 (0.0 – 75.0)    | 25.0 (0.0 – 100.0)  |              |
|                       | Headaches                             | <b>Mean (SD)</b>        | 17.9 (20.6)          | 21.9 (24.2)         | 0.654        |
|                       |                                       | <b>Median (Q1 – Q3)</b> | 12.5 (0.0 – 50.0)    | 25.0 (0.0 – 75.0)   |              |
|                       | Stomach aches                         | <b>Mean (SD)</b>        | 12.5 (23.5)          | 17.3 (26.1)         | 0.533        |
|                       |                                       | <b>Median (Q1 – Q3)</b> | 0.0 (0.0 – 75.0)     | 0.0 (0.0 – 100.0)   |              |
|                       | Tiredness                             | <b>Mean (SD)</b>        | 37.5 (27.3)          | 45.5 (27.5)         | 0.455        |
|                       |                                       | <b>Median (Q1 – Q3)</b> | 50.0 (0.0 – 75.0)    | 50.0 (0.0 – 100.0)  |              |
|                       | Trembling hands                       | <b>Mean (SD)</b>        | 10.7 (18.9)          | 12.8 (23.7)         | 0.975        |
|                       |                                       | <b>Median (Q1 – Q3)</b> | 0.0 (0.0 – 50.0)     | 0.0 (0.0 – 100.0)   |              |
|                       | Irritability                          | <b>Mean (SD)</b>        | 25.0 (21.9)          | 34.8 (25.2)         | 0.180        |
|                       |                                       | <b>Median (Q1 – Q3)</b> | 25.0 (0.0 – 50.0)    | 50.0 (0.0 – 100.0)  |              |
|                       | Aggressiveness                        | <b>Mean (SD)</b>        | 5.4 (10.6)           | 13.6 (22.4)         | 0.294        |
|                       |                                       | <b>Median (Q1 – Q3)</b> | 0.0 (0.0 – 25.0)     | 0.0 (0.0 – 75.0)    |              |
|                       | Moodiness                             | <b>Mean (SD)</b>        | 19.6 (22.3)          | 23.6 (25.2)         | 0.650        |
|                       |                                       | <b>Median (Q1 – Q3)</b> | 12.5 (0.0 – 50.0)    | 25.0 (0.0 – 75.0)   |              |
|                       | Sadness                               | <b>Mean (SD)</b>        | 26.8 (30.2)          | 29.3 (28.2)         | 0.687        |
|                       |                                       | <b>Median (Q1 – Q3)</b> | 25.0 (0.0 – 100.0)   | 25.0 (0.0 – 100.0)  |              |
|                       | Anxiety                               | <b>Mean (SD)</b>        | 23.2 (28.5)          | 21.9 (29.6)         | 0.751        |
|                       |                                       | <b>Median (Q1 – Q3)</b> | 12.5 (0.0 – 75.0)    | 0.0 (0.0 – 100.0)   |              |
|                       | Lack of concentration                 | <b>Mean (SD)</b>        | 23.2 (24.9)          | 24.7 (26.4)         | 0.914        |
|                       |                                       | <b>Median (Q1 – Q3)</b> | 25.0 (0.0 – 75.0)    | 25.0 (0.0 – 100.0)  |              |
|                       | Slow thinking                         | <b>Mean (SD)</b>        | 7.1 (15.3)           | 19.9 (27.6)         | 0.098        |
|                       |                                       | <b>Median (Q1 – Q3)</b> | 0.0 (0.0 – 50.0)     | 0.0 (0.0 – 100.0)   |              |
| <b>PKU in general</b> | Emotional impact of PKU               | <b>Mean (SD)</b>        | 42.5 (22.3)          | 44.9 (22.2)         | 0.927        |
|                       |                                       | <b>Median (Q1 – Q3)</b> | 45.0 (0.0 – 70.0)    | 45.0 (0.0 – 100.0)  |              |
|                       | Practical impact of PKU               | <b>Mean (SD)</b>        | 12.7 (17.0)          | 18.6 (16.9)         | 0.204        |
|                       |                                       | <b>Median (Q1 – Q3)</b> | 8.3 (0.0 – 58.3)     | 16.7 (0.0 – 75.0)   |              |
|                       | Social impact of PKU                  | <b>Mean (SD)</b>        | 14.1 (9.1)           | 18.4 (16.2)         | 0.601        |
|                       |                                       | <b>Median (Q1 – Q3)</b> | 16.7 (0.0 – 31.3)    | 16.7 (0.0 – 68.8)   |              |
|                       | Overall impact of PKU                 | <b>Mean (SD)</b>        | 22.4 (12.0)          | 30.9 (15.7)         | 0.373        |
|                       |                                       | <b>Median (Q1 – Q3)</b> | 24.0 (8.3 – 33.3)    | 27.1 (2.1 – 68.8)   |              |
|                       | Anxiety - Blood test                  | <b>Mean (SD)</b>        | 9.6 (11.6)           | 10.8 (23.4)         | 0.308        |
|                       |                                       | <b>Median (Q1 – Q3)</b> | 0.0 (0.0 – 25.0)     | 0.0 (0.0 – 100.0)   |              |
|                       | Anxiety - Phe levels                  | <b>Mean (SD)</b>        | 39.3 (21.3)          | 36.2 (28.2)         | 0.559        |
|                       |                                       | <b>Median (Q1 – Q3)</b> | 37.5 (0.0 – 75.0)    | 25.0 (0.0 – 100.0)  |              |
|                       | Anxiety - Phe levels during pregnancy | <b>Mean (SD)</b>        | 80.6 (24.3)          | 80.8 (24.8)         | 0.959        |
|                       |                                       | <b>Median (Q1 – Q3)</b> | 100.0 (50.0 – 100.0) | 100.0 (0.0 – 100.0) |              |
|                       | Financial impact of PKU               | <b>Mean (SD)</b>        | 3.6 (9.1)            | 21.3 (28.3)         | <b>0.013</b> |
|                       |                                       | <b>Median (Q1 – Q3)</b> | 0.0 (0.0 – 25.0)     | 0.0 (0.0 – 100.0)   |              |
|                       | Information on PKU                    | <b>Mean (SD)</b>        | 30.4 (20.0)          | 34.8 (24.9)         | 0.570        |
|                       |                                       | <b>Median (Q1 – Q3)</b> | 25.0 (0.0 – 75.0)    | 25.0 (0.0 – 100.0)  |              |

**Table 3\_c : Comparison of the Adult PKU-QOL scores according to BH4 intake (cont'd)**

| Modules                            | Domains                                                  |                         | BH4<br>(N=15)       | No BH4<br>(N=89)   | p-value*     |
|------------------------------------|----------------------------------------------------------|-------------------------|---------------------|--------------------|--------------|
| <b>Supplement administration</b>   | Adherence to supplements                                 | <b>Mean (SD)</b>        | 11.1 (9.6)          | 20.8 (20.4)        | 0.567        |
|                                    |                                                          | <b>Median (Q1 – Q3)</b> | 16.7 (0.0 – 16.7)   | 16.7 (0.0 – 66.7)  |              |
|                                    | Practical impact of supplements                          | <b>Mean (SD)</b>        | 9.4 (10.8)          | 22.6 (21.7)        | 0.257        |
|                                    |                                                          | <b>Median (Q1 – Q3)</b> | 6.3 (0.0 – 25.0)    | 18.8 (0.0 – 100.0) |              |
|                                    | Guilt if poor adherence to supplements                   | <b>Mean (SD)</b>        | 50.0 (28.9)         | 47.8 (33.3)        | 0.886        |
|                                    |                                                          | <b>Median (Q1 – Q3)</b> | 50.0 (25.0 – 75.0)  | 50.0 (0.0 – 100.0) |              |
|                                    | Relationships within family because of supplements       | <b>Mean (SD)</b>        | 18.8 (37.5)         | 10.8 (21.4)        | 0.891        |
|                                    |                                                          | <b>Median (Q1 – Q3)</b> | 0.0 (0.0 – 75.0)    | 0.0 (0.0 – 100.0)  |              |
|                                    | Taste - Supplements                                      | <b>Mean (SD)</b>        | 50.0 (20.4)         | 49.7 (25.8)        | 0.926        |
|                                    |                                                          | <b>Median (Q1 – Q3)</b> | 50.0 (25.0 – 75.0)  | 50.0 (0.0 – 100.0) |              |
| <b>Dietary protein restriction</b> | Food temptations                                         | <b>Mean (SD)</b>        | 12.5 (12.5)         | 36.7 (24.8)        | <b>0.027</b> |
|                                    |                                                          | <b>Median (Q1 – Q3)</b> | 12.5 (0.0 – 25.0)   | 37.5 (0.0 – 100.0) |              |
|                                    | Adherence to dietary protein restriction                 | <b>Mean (SD)</b>        | 4.7 (9.4)           | 20.6 (18.2)        | 0.064        |
|                                    |                                                          | <b>Median (Q1 – Q3)</b> | 0.0 (0.0 – 18.8)    | 20.0 (0.0 – 56.3)  |              |
|                                    | Social impact of dietary protein-restriction             | <b>Mean (SD)</b>        | 2.7 (3.8)           | 19.0 (18.6)        | <b>0.016</b> |
|                                    |                                                          | <b>Median (Q1 – Q3)</b> | 0.0 (0.0 – 8.3)     | 15.8 (0.0 – 79.2)  |              |
|                                    | Practical impact of dietary protein restriction          | <b>Mean (SD)</b>        | 15.5 (14.5)         | 36.5 (19.6)        | <b>0.019</b> |
|                                    |                                                          | <b>Median (Q1 – Q3)</b> | 12.5 (0.0 – 39.3)   | 35.7 (0.0 – 75.0)  |              |
|                                    | Overall impact of dietary protein restriction            | <b>Mean (SD)</b>        | 9.5 (9.4)           | 27.7 (17.1)        | <b>0.016</b> |
|                                    |                                                          | <b>Median (Q1 – Q3)</b> | 6.8 (0.0 – 25.0)    | 26.9 (0.0 – 75.0)  |              |
|                                    | Taste – low protein food                                 | <b>Mean (SD)</b>        | 50.0 (.)            | 33.1 (21.4)        | 0.292        |
|                                    |                                                          | <b>Median (Q1 – Q3)</b> | 50.0 (50.0 – 50.0)  | 25.0 (0.0 – 100.0) |              |
|                                    | Food enjoyment                                           | <b>Mean (SD)</b>        | 10.0 (13.7)         | 27.2 (30.0)        | 0.223        |
|                                    |                                                          | <b>Median (Q1 – Q3)</b> | 0.0 (0.0 – 25.0)    | 25.0 (0.0 – 100.0) |              |
|                                    | Guilt if dietary protein restriction not followed        | <b>Mean (SD)</b>        | 65.0 (28.5)         | 53.2 (31.9)        | 0.415        |
|                                    |                                                          | <b>Median (Q1 – Q3)</b> | 75.0 (25.0 – 100.0) | 50.0 (0.0 – 100.0) |              |
|                                    | Overall difficulty following dietary protein restriction | <b>Mean (SD)</b>        | 16.7 (30.3)         | 29.1 (27.9)        | 0.232        |
|                                    |                                                          | <b>Median (Q1 – Q3)</b> | 0.0 (0.0 – 75.0)    | 25.0 (0.0 – 100.0) |              |

\*Non-parametric P-value for between-group comparisons: Mann-Whitney-Wilcoxon  
 In bold p-value<0.05

**Table 3\_d : Comparison of the Parent PKU-QOL scores according to patient's BH4 intake**

| Modules               | Domains                              |                  | BH4<br>(N=67)      | No BH4<br>(N=186)  | p-value*     |
|-----------------------|--------------------------------------|------------------|--------------------|--------------------|--------------|
| <b>Symptoms</b>       | Child health status                  | Mean (SD)        | 28.0 (22.4)        | 32.5 (24.4)        | 0.221        |
|                       |                                      | Median (Q1 – Q3) | 25.0 (0.0 – 75.0)  | 25.0 (0.0 – 100.0) |              |
|                       | Headaches                            | Mean (SD)        | 13.8 (21.0)        | 14.8 (20.7)        | 0.624        |
|                       |                                      | Median (Q1 – Q3) | 0.0 (0.0 – 75.0)   | 0.0 (0.0 – 75.0)   |              |
|                       | Stomach aches                        | Mean (SD)        | 23.5 (26.8)        | 17.3 (23.2)        | 0.107        |
|                       |                                      | Median (Q1 – Q3) | 25.0 (0.0 – 75.0)  | 0.0 (0.0 – 100.0)  |              |
|                       | Tiredness                            | Mean (SD)        | 32.1 (25.3)        | 31.9 (24.9)        | 0.926        |
|                       |                                      | Median (Q1 – Q3) | 25.0 (0.0 – 100.0) | 25.0 (0.0 – 100.0) |              |
|                       | Irritability                         | Mean (SD)        | 38.1 (28.7)        | 35.2 (27.1)        | 0.523        |
|                       |                                      | Median (Q1 – Q3) | 50.0 (0.0 – 100.0) | 25.0 (0.0 – 100.0) |              |
|                       | Aggressiveness                       | Mean (SD)        | 14.4 (22.0)        | 12.4 (21.8)        | 0.443        |
|                       |                                      | Median (Q1 – Q3) | 0.0 (0.0 – 75.0)   | 0.0 (0.0 – 100.0)  |              |
|                       | Moodiness                            | Mean (SD)        | 34.1 (27.6)        | 25.3 (24.6)        | <b>0.023</b> |
|                       |                                      | Median (Q1 – Q3) | 25.0 (0.0 – 100.0) | 25.0 (0.0 – 100.0) |              |
|                       | Sadness                              | Mean (SD)        | 18.2 (22.6)        | 18.2 (20.8)        | 0.819        |
|                       |                                      | Median (Q1 – Q3) | 0.0 (0.0 – 100.0)  | 25.0 (0.0 – 100.0) |              |
|                       | Anxiety                              | Mean (SD)        | 14.8 (21.7)        | 14.0 (21.9)        | 0.708        |
|                       |                                      | Median (Q1 – Q3) | 0.0 (0.0 – 75.0)   | 0.0 (0.0 – 100.0)  |              |
|                       | Lack of concentration                | Mean (SD)        | 34.1 (28.6)        | 29.0 (28.1)        | 0.192        |
|                       |                                      | Median (Q1 – Q3) | 25.0 (0.0 – 100.0) | 25.0 (0.0 – 100.0) |              |
| Slow thinking         | Mean (SD)                            | 20.8 (25.8)      | 19.6 (26.8)        | 0.611              |              |
|                       | Median (Q1 – Q3)                     | 0.0 (0.0 – 75.0) | 0.0 (0.0 – 100.0)  |                    |              |
| <b>PKU in general</b> | Emotional impact of PKU              | Mean (SD)        | 40.9 (25.3)        | 43.1 (22.1)        | 0.381        |
|                       |                                      | Median (Q1 – Q3) | 43.8 (0.0 – 93.8)  | 37.5 (0.0 – 100.0) |              |
|                       | Practical impact of PKU              | Mean (SD)        | 11.4 (12.9)        | 15.3 (14.8)        | 0.061        |
|                       |                                      | Median (Q1 – Q3) | 4.2 (0.0 – 41.7)   | 12.5 (0.0 – 70.0)  |              |
|                       | Social impact of PKU                 | Mean (SD)        | 15.8 (15.9)        | 17.5 (17.0)        | 0.346        |
|                       |                                      | Median (Q1 – Q3) | 10.0 (0.0 – 55.0)  | 12.5 (0.0 – 90.0)  |              |
|                       | Overall impact of PKU                | Mean (SD)        | 21.4 (15.3)        | 24.7 (15.5)        | 0.083        |
|                       |                                      | Median (Q1 – Q3) | 18.8 (0.0 – 56.7)  | 21.7 (0.0 – 76.9)  |              |
|                       | Child anxiety - Blood test           | Mean (SD)        | 23.3 (27.4)        | 23.7 (28.0)        | 0.981        |
|                       |                                      | Median (Q1 – Q3) | 12.5 (0.0 – 100.0) | 12.5 (0.0 – 100.0) |              |
|                       | Impact of child anxiety - Blood test | Mean (SD)        | 21.9 (27.1)        | 25.6 (29.1)        | 0.386        |
|                       |                                      | Median (Q1 – Q3) | 12.5 (0.0 – 100.0) | 12.5 (0.0 – 100.0) |              |
|                       | Anxiety - Phe levels                 | Mean (SD)        | 60.2 (33.7)        | 52.9 (31.0)        | 0.113        |
|                       |                                      | Median (Q1 – Q3) | 75.0 (0.0 – 100.0) | 50.0 (0.0 – 100.0) |              |
|                       | Financial impact of PKU              | Mean (SD)        | 24.2 (28.6)        | 27.2 (29.1)        | 0.428        |
|                       |                                      | Median (Q1 – Q3) | 25.0 (0.0 – 100.0) | 25.0 (0.0 – 100.0) |              |
|                       | Information on PKU                   | Mean (SD)        | 27.3 (20.0)        | 32.6 (25.7)        | 0.178        |
|                       |                                      | Median (Q1 – Q3) | 25.0 (0.0 – 100.0) | 25.0 (0.0 – 100.0) |              |

**Table 3\_d : Comparison of the Parent PKU-QOL scores according to patient's BH4 intake (cont'd)**

| <b>Modules</b>                                    | <b>Domains</b>                                     |                                          | <b>BH4<br/>Mean (SD)<br/>(N=67)</b> | <b>No BH4<br/>Mean (SD)<br/>(N=186)</b> | <b>p-value*</b>   |       |
|---------------------------------------------------|----------------------------------------------------|------------------------------------------|-------------------------------------|-----------------------------------------|-------------------|-------|
| <b>Supplement administration</b>                  | Adherence to supplements                           | <b>Mean (SD)</b>                         | 9.6 (13.3)                          | 12.4 (19.3)                             | 0.681             |       |
|                                                   |                                                    | <b>Median (Q1 – Q3)</b>                  | 0.0 (0.0 – 50.0)                    | 0.0 (0.0 – 100.0)                       |                   |       |
|                                                   | Management of supplements                          | <b>Mean (SD)</b>                         | 12.8 (26.0)                         | 18.8 (27.7)                             | 0.077             |       |
|                                                   |                                                    | <b>Median (Q1 – Q3)</b>                  | 0.0 (0.0 – 100.0)                   | 0.0 (0.0 – 100.0)                       |                   |       |
|                                                   | Practical impact of supplements                    | <b>Mean (SD)</b>                         | 16.8 (24.3)                         | 21.6 (23.2)                             | 0.113             |       |
|                                                   |                                                    | <b>Median (Q1 – Q3)</b>                  | 8.3 (0.0 – 100.0)                   | 16.7 (0.0 – 100.0)                      |                   |       |
|                                                   | Guilt if poor adherence to supplements             | <b>Mean (SD)</b>                         | 51.6 (33.9)                         | 52.7 (34.2)                             | 0.849             |       |
|                                                   |                                                    | <b>Median (Q1 – Q3)</b>                  | 50.0 (0.0 – 100.0)                  | 50.0 (0.0 – 100.0)                      |                   |       |
|                                                   | Relationships within family because of supplements | <b>Mean (SD)</b>                         | 15.1 (24.0)                         | 20.6 (26.8)                             | 0.189             |       |
|                                                   |                                                    | <b>Median (Q1 – Q3)</b>                  | 0.0 (0.0 – 75.0)                    | 0.0 (0.0 – 100.0)                       |                   |       |
|                                                   | <b>Dietary protein restriction</b>                 | Adherence to dietary protein restriction | <b>Mean (SD)</b>                    | 8.7 (20.1)                              | 15.1 (26.2)       | 0.102 |
|                                                   |                                                    |                                          | <b>Median (Q1 – Q3)</b>             | 0.0 (0.0 – 100.0)                       | 0.0 (0.0 – 100.0) |       |
| Management of dietary protein restriction         |                                                    | <b>Mean (SD)</b>                         | 24.0 (21.6)                         | 24.8 (22.2)                             | 0.906             |       |
|                                                   |                                                    | <b>Median (Q1 – Q3)</b>                  | 20.8 (0.0 – 83.3)                   | 20.8 (0.0 – 100.0)                      |                   |       |
| Practical impact of dietary protein restriction   |                                                    | <b>Mean (SD)</b>                         | 29.7 (18.1)                         | 32.5 (21.5)                             | 0.537             |       |
|                                                   |                                                    | <b>Median (Q1 – Q3)</b>                  | 28.6 (0.0 – 64.3)                   | 28.6 (0.0 – 82.1)                       |                   |       |
| Child food enjoyment                              |                                                    | <b>Mean (SD)</b>                         | 19.7 (21.5)                         | 20.5 (25.0)                             | 0.812             |       |
|                                                   |                                                    | <b>Median (Q1 – Q3)</b>                  | 25.0 (0.0 – 100.0)                  | 25.0 (0.0 – 100.0)                      |                   |       |
| Guilt if dietary protein restriction not followed |                                                    | <b>Mean (SD)</b>                         | 38.0 (34.7)                         | 47.3 (35.1)                             | 0.091             |       |
|                                                   |                                                    | <b>Median (Q1 – Q3)</b>                  | 25.0 (0.0 – 100.0)                  | 50.0 (0.0 – 100.0)                      |                   |       |

\*Non-parametric P-value for between-group comparisons: Mann-Whitney-Wilcoxon  
In bold p-value<0.05
